# Supplementary material for: Impact of the COVID-19 pandemic on the core functions of primary care: will the cure be worse than the disease? A qualitative interview study in Flemish GPs
Source: PubMed Central journal article supplement — BMJ Open. 2020 Jun 17;10(6):e039674. doi: 10.1136/bmjopen-2020-039674 (PMC7306272; doi:10.1136/bmjopen-2020-039674), 2020-06-17
Supplement: bmjopen-2020-039674.draft_revisions.pdf [file bmjopen-2020-039674.draft_revisions.pdf]

# BMJ Open

BMJ Open is committed to open peer review. As part of this commitment we make the peer review history of every article we publish publicly available.

When an article is published we post the peer reviewers' comments and the authors' responses online. We also post the versions of the paper that were used during peer review. These are the versions that the peer review comments apply to.

The versions of the paper that follow are the versions that were submitted during the peer review process. They are not the versions of record or the final published versions. They should not be cited or distributed as the published version of this manuscript.

BMJ Open is an open access journal and the full, final, typeset and author-corrected version of record of the manuscript is available on our site with no access controls, subscription charges or pay-per-view fees (<http://bmjopen.bmj.com>).

If you have any questions on BMJ Open's open peer review process please email [info.bmjopen@bmj.com](mailto:info.bmjopen@bmj.com)

# BMJ Open

**Impact of the COVID-19 pandemic on the core functions of primary care: will the cure be worse than the disease?  
A qualitative interview study in Flemish GPs.**

|                               |                                                                                                                                                                                                                                                                                                                                                                  |
|-------------------------------|------------------------------------------------------------------------------------------------------------------------------------------------------------------------------------------------------------------------------------------------------------------------------------------------------------------------------------------------------------------|
| Journal:                      | <i>BMJ Open</i>                                                                                                                                                                                                                                                                                                                                                  |
| Manuscript ID                 | bmjopen-2020-039674                                                                                                                                                                                                                                                                                                                                              |
| Article Type:                 | Original research                                                                                                                                                                                                                                                                                                                                                |
| Date Submitted by the Author: | 23-Apr-2020                                                                                                                                                                                                                                                                                                                                                      |
| Complete List of Authors:     | Verhoeven, Veronique; University of Antwerp, Primary and interdisciplinary care<br>Tsakitzidis, Giannoula; University of Antwerp, Department of Primary and Interdisciplinary Care<br>Philips, Hilde; University of Antwerp, Primary and Interdisciplinary Care<br>Van Royen, Paul; Universiteit van Antwerpen, Decanaat Geneeskunde en Gezondheidswetenschappen |
| Keywords:                     | PRIMARY CARE, Organisation of health services < HEALTH SERVICES ADMINISTRATION & MANAGEMENT, QUALITATIVE RESEARCH                                                                                                                                                                                                                                                |
|                               |                                                                                                                                                                                                                                                                                                                                                                  |

SCHOLARONE™  
Manuscripts

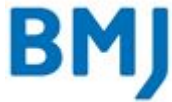

I, the Submitting Author has the right to grant and does grant on behalf of all authors of the Work (as defined in the below author licence), an exclusive licence and/or a non-exclusive licence for contributions from authors who are: i) UK Crown employees; ii) where BMJ has agreed a CC-BY licence shall apply, and/or iii) in accordance with the terms applicable for US Federal Government officers or employees acting as part of their official duties; on a worldwide, perpetual, irrevocable, royalty-free basis to BMJ Publishing Group Ltd ("BMJ") its licensees and where the relevant Journal is co-owned by BMJ to the co-owners of the Journal, to publish the Work in this journal and any other BMJ products and to exploit all rights, as set out in our [licence](#).

The Submitting Author accepts and understands that any supply made under these terms is made by BMJ to the Submitting Author unless you are acting as an employee on behalf of your employer or a postgraduate student of an affiliated institution which is paying any applicable article publishing charge ("APC") for Open Access articles. Where the Submitting Author wishes to make the Work available on an Open Access basis (and intends to pay the relevant APC), the terms of reuse of such Open Access shall be governed by a Creative Commons licence – details of these licences and which [Creative Commons](#) licence will apply to this Work are set out in our licence referred to above.

Other than as permitted in any relevant BMJ Author's Self Archiving Policies, I confirm this Work has not been accepted for publication elsewhere, is not being considered for publication elsewhere and does not duplicate material already published. I confirm all authors consent to publication of this Work and authorise the granting of this licence.

# Impact of the COVID-19 pandemic on the core functions of primary care: will the cure be worse than the disease?

## A qualitative interview study in Flemish GPs.

### Authors:

Veronique Verhoeven, Professor Department of primary and interdisciplinary care, University of Antwerp

Giannoula Tsakitzidis, Post-doc Researcher Department of primary and interdisciplinary care, University of Antwerp

Hilde Philips, Professor Department of primary and interdisciplinary care, University of Antwerp

Paul Van Royen, Professor Department of primary and interdisciplinary care, University of Antwerp

Corresponding author: Veronique.verhoeven@uantwerpen.be +32 (0) 3 265 25 18

Address for all authors: University of Antwerp, Faculty of Medicine and Health Sciences, Department of Primary and Interdisciplinary Care, Gouverneur Kinsbergen Centrum, Doornstraat 331, 2610 Antwerpen, Belgium

Word count: 5250

Keywords: COVID-19, SARS-CoV-2, Primary Care, General Practice, Organization of health care

**ABSTRACT**

**OBJECTIVES:** The current COVID-19 pandemic, as well as the measures taken to control it, have a profound impact on healthcare. This study was set up to gain insights in the consequences of the COVID-19 outbreak on the core competencies of general practice, as they are experienced by GPs in the frontline.

**DESIGN, SETTING, PARTICIPANTS:** We performed a descriptive study using semi-structured interviews with 132 GPs, using a topic list based on the WONCA definition of core competencies in general practice. Data were analysed qualitatively using thematic analysis.

**RESULTS:** Changes in practice management and in consultation strategies were quickly adopted. There was a major switch towards telephone triage and consults, for covid- as well as for non-covid related problems. Patient-centered care is still a major objective. Clinical decision making is largely focused on respiratory assessment and triage, and GPs feel acute care is compromised, both by their own changed focus as by the fact that patients consult less frequently for non-covid problems. Chronic care is mostly postponed, and this will have consequences that will extend and become visible after the corona crisis. Through the holistic eyes of primary care, the current outbreak as well as the measures taken to control it, will have a profound impact on psychological and socio-economic wellbeing. This impact is already visible in vulnerable people and will continue to become clear in the medium and long term. Possibly the side-effects of the cure will be worse than the disease. GPs think they are at high risk to get infected. Dropping out and being unable to contribute their part or become a virus transmitter are reported to be greater concerns than getting ill themselves.

**CONCLUSIONS:** Primary care reorganized itself promptly as a response to the challenges presented by the COVID-19 epidemic. Although the vast increase in patients soliciting medical help and the necessary separate covid- and non-covid flows have been dealt with, GPs are worried about the continuity of regular care and the consequences of the anti-covid measures. These may become a threat for the general health in the population and for the provision of primary health care in the near and further future.

**INTERVENTIONS:** N/A

**PRIMARY AND SECONDARY OUTCOME MEASURES:** N/A

**Strengths and limitations summary**

strength: °large number of interviews in the hectic early phase of the outbreak

strength: °large variation in our GPs' sample, leading to rich data

strength: °first article of its kind as far as we could find

limitation: °interview reports may reflect interviewers' interpretations

limitation: °interviewers were medical students

## INTRODUCTION

The current COVID-19 pandemic puts a before unseen stress on the organization of healthcare. In several countries the demand for medical care exceeds the available resources, urging stakeholders to reorganize the medical landscape(1). Chronic and non-urgent care in hospitals have been largely suspended to increase the capacity of emergency and respiratory care.

On 16<sup>th</sup> of March 2020, the Belgian government rolled out an emergency plan for general practice, in which telephone triage was defined as the primary means of COVID-19 triage, and in which the establishment of physical triage centers was mandated. These centers are accessible after telephone triage, and have a threefold goal: 1) to create a safe environment for general practitioners (GPs) to examine patients with suspected COVID-19 pathology; 2) to ascertain an optimal use of the scarce PPE (personal protection equipment) resources, and 3) to avoid congestion at emergency departments by diverting into these triage centers.

The emergency plan led to a quick rise of “corona centers”, largely initiated by local GPs’ teams and often organized within the structure of existing out of hours General Practice Cooperatives(2). The centers are manned 7/7 by a rotation of mainly GPs in the neighbourhood.

Evidently, these measures have a profound impact on primary care – an impact which extends far beyond the organizational and logistic level(3). Primary care is the first point of contact for patients with symptoms, worries, anxiety and questions concerning the epidemic. In the meantime, regular health problems do not cease to exist.

This COVID-19 outbreak is a challenge for each of the GP’s core competencies, as they are described in the European definition of General Practice, revised in 2005 and 2011 (WONCA, 2011)(4,5) (figure 1). *Primary care management* requires solutions to tackle the increased number of patient contacts and to separate covid – and non-covid flows. *Person-centered care* needs to be maintained in the shift to telephone consultations. *Decision making skills* must account for the changed epidemiology and the need for regular and covid-related care. A *comprehensive approach* includes covid-specific risk management and health education. *Community orientation* is evidently extremely important in the context of an infectious outbreak, and, finally, psychological, socio-cultural, and existential dimensions define the *holistic context* in which the GP operates.

This pandemic affects medical education as well; family medicine internships, planned for medical students in the 3<sup>rd</sup> year of their bachelor’s degree at Antwerp University, were cancelled. As an assignment replacing their internship, our students conducted telephone interviews with GPs who, in this context, were willing to offer some of their time in this busy period to describe in what way the “corona crisis” affects their practice.

The purpose of these interviews, and of the present report, is to gain qualitative insights in the consequences of the COVID-19 outbreak on the core competencies of general practice, as they are experienced by GPs in the field. The interviews were taken in the early phase of the outbreak, in a time when a new routine was not yet established.

## METHODS

### Setting and participants

Semi-structured interviews were conducted by medical students in the 3<sup>rd</sup> year of their bachelor's degree, between 24<sup>th</sup> March and 31<sup>th</sup> March. One hundred and thirty-two students conducted 132 interviews with GPs in the field in Flanders. Some of them were the original internship supervisors, and others were recruited ad hoc via a COVID-19 private Facebook group for medical doctors.

### Data collection and analysis

We used an interview guide (see supplementary file) which was based on the core competencies of the general practitioner in the European definition of General Practice(4). Since the six core competencies were previously used to build up a research agenda for primary care(6), this framework was a good starting point for the topic list and further thematic analysis. In addition to the 6 questions based on the core competencies, GPs were asked what measures they took to protect themselves against COVID-19 during their work. Interviews were conducted by telephone, on a moment beforehand agreed with the GP. A written report of the interview was made by the interviewer and then sent to the individual GP, who checked it for correctness and completeness. An inductive thematic analysis approach was used to analyze data(7,8). One author independently categorized and coded initial transcripts of ten interviews and developed a draft coding framework which was then discussed and agreed by the rest of the team. The remaining interviews were then analyzed by the research team using this framework, while changes and additions were made when other themes emerged. The research team was multidisciplinary and consisted of academic GPs and a physiotherapist, internship supervisors and qualitative research experts. All of them reviewed and discussed the coding on several occasions using investigators' triangulation, in order to reach consensus about the interpretation and to enhance trustworthiness of the process(9). Saturation was reached after 59 interviews, however all 132 interviews were reviewed for this report.

### Ethical considerations

The ethics committee of the University of Antwerp – Antwerp University Hospital granted ethics approval for the study (ref20/14/170). Participants gave informed consent for the interviews.

### Patient and public involvement

No patient involved.

## RESULTS

The characteristics of participants are shown in table 1. Fourteen of the original internship supervisors dropped out because of time constraints or illness and were replaced by another GP. A mix of internship supervisors, academics, and GPs affiliated to university was obtained. Mean duration of the interviews was 26minutes (range 15-60 min, SD = 9 min).

Table 1: Characteristics of interviewees

|                                |                               |
|--------------------------------|-------------------------------|
| Mean age (SD, range)           | 41,88 (SD 12.53; range 24-67) |
| <i>Gender</i>                  |                               |
| M                              | 51                            |
| F                              | 81                            |
| <i>Network</i>                 |                               |
| Academic                       | 11                            |
| Internship supervisor network  | 74                            |
| Recruited through social media | 38                            |
| GP trainee                     | 9                             |
| <i>Type of GP practice</i>     |                               |
| Solo                           | 15                            |
| Group                          | 111                           |
| Community Health Center        | 4                             |
| Not known                      | 2                             |
| <i>Practice location</i>       |                               |
| Inner city                     | 43                            |
| Suburban                       | 59                            |
| Rural                          | 27                            |
| Not known                      | 3                             |

We defined 7 main themes, of which the first 6 coincide with the primary care core competencies. A seventh theme about personal protection was added in the current context of the COVID-19 outbreak.

### Theme 1: Primary care management

Within this theme GPs explain what adjustments they have applied to cope with the governmental guidelines regarding COVID-19. They collaborate with the above described "corona centers" to separate covid- and non-covid flows. The primary contact with patients is now by telephone. Online agendas where people can take an appointment are closed or, if possible, restructured, to discriminate between respiratory and other complaints.



1  
2  
3 *"...all ill people with possible symptoms of the contagious coronavirus, like cough or fever, are kept*  
4 *out of our practice. This means that these days we hardly have patient visits at our practice. Patients*  
5 *with a possible infection are sent to a regional triage center"*  
6

7  
8 *" we only see acute patients without upper respiratory complaints, so we do not bring other patients*  
9 *in danger. We do not work anymore online for appointments or open consultations"*  
10

11 This means they see few people per day face to face, only those with acute non-covid problems; the  
12 work is different in these circumstances. GPs start early with phone calls, adjusting their website,  
13 reading the news and relevant papers to stay informed. There is more administrative workload than  
14 usual. Some GPs perceive the workload as higher because of the phone calls and the need to stay  
15 informed, and others perceive it as lower because of the drop in physical consultations.  
16

17  
18 *"...The workload is different from the usual: you need to start earlier, make a lot of phone calls, send*  
19 *emails in between, try to keep up to date by reading a lot, adjust your website...so you're busy the*  
20 *whole day...."*  
21

22  
23 Many GPs mention more structured working schedules within their practice. Agreements are made  
24 to divide and reallocate jobs for telephone triage, telephone consultations, face to face consultations  
25 and working in the "corona centers"..  
26

27  
28 *"...the older doctors in our practice focus on the telephone consultations, to minimize the risk for*  
29 *them..."*  
30

31  
32 *"Our GPs and the trainee work at the moment in shifts of four hours. Where possible, the nurse*  
33 *participates in telephone triage. Her tasks are now mainly replaced by helping dealing with the flood*  
34 *of phone calls...."*  
35

36 Meetings with other GPs were set up to choose the procedures for self-protection and material, and  
37 to decide what to do to guarantee continuity of care.  
38

39  
40 *"...If a colleague drops out because of illness, he has to notify the coordinating GP in the region, that*  
41 *way a solution is sought to try to guarantee continuity by GPs in the neighbourhood..."*  
42

43 The impact of the decrease in physical consults on GPs' income is obvious, as in Belgium GPs work  
44 mainly in a fee-for-service system. Some doctors have developed a system for this to be paid per  
45 shift they work regardless the tasks they do. This change is welcome because making mainly phone  
46 calls and doing administrative work is frustrating for many. Furthermore, health insurance now  
47 reimburses phone consultations within certain limits, which was not the case before COVID-19  
48 outbreak  
49

50  
51 *"Normally GPs work in a fee-for-service system, but now everything is pooled. All incomes are divided*  
52 *by the number of shifts a doctor works. Thus doctors are paid for each shift, including for the other*  
53 *tasks that are normally not seen as a paid service. Because the load of administrative work is*  
54 *sometimes quite frustrating, this change is more than welcome..."*  
55

56  
57 Measures are taken within the practices, to make them more "infection-proof" to keep performing  
58 regular care, such as removing unnecessary materials in waiting or consultations rooms. The number  
59 of patients in the waiting room is limited, or patients are asked to wait for their turn in their car.  
60

1  
2  
3 *"...The door of the waiting room has been removed..."*  
4

5 *"...The practice has plexiglass now at the doctor's desk, the patient can sit on the other side...."*  
6

7 *'All non-necessary materials were removed from the consultation room to prevent contamination and*  
8 *spoilage of consumables.'*  
9

10 Collaboration in primary care with psychologists, psychiatrists is more intense than usual, and this is  
11 considered as very important in these circumstances.  
12

13  
14 *"It is important to stress that there is a lot of solidarity between the different health care providers. A*  
15 *psychologist contacted me because she wants to help with the care for anxious patients, that way the*  
16 *task to reassure people can be taken over"*  
17

18 The corona-epidemic has also an effect on the collaboration with other medical specialists. Some  
19 specialists seem to have more time to exchange information more in depth and this facilitates  
20 collaboration, but for non-urgent care the collaboration is less satisfactory.  
21

22  
23 *"Specialists have more time now, they also had to cancel all their appointments...now they are more*  
24 *helpful and approachable because they are less busy, and the collaboration with the GP is smoother*  
25 *than usual..."*  
26

27  
28 *"All non-urgent care has been cancelled, so the patient automatically ends up with his GP again. This*  
29 *of course affects the workload.*  
30

## 31 32 33 34 35 36 **Theme 2: Person-Centered care**

37  
38 The switch towards telephone consultations makes the job more difficult for most GPs. The loss of  
39 non-verbal communication, the lack of articulacy in some patients, intercultural communication and  
40 associated language problems are mentioned as barriers.  
41

42  
43 *"...in the beginning I needed to get used to it, because for a GP, body language is very*  
44 *important....and in our region there are lots of different cultures and languages, so you need to try to*  
45 *explain them in German or English or French, and you don't really know if they understand..."*  
46

47 Having their own, known patients on the phone is a huge advantage; telephone calls with patients  
48 that are not their own are a lot more difficult. Facilitators are using the ICE frame (ideas, concerns,  
49 expectations), and the implementation of video consults. Still, these novel ways of working cause  
50 stress and the fear to miss important diagnoses.  
51

52  
53 *"...I referred a bowel perforation with peritonitis timely to the ER, but another man died on a bench,*  
54 *both after a telephone consultation..."*  
55

56  
57 GPs stress that person-centered care is still the primary goal in their consults. The focus is not only  
58 on triage of physical complaints, but they take their time to assess fear, to reassure people and to  
59  
60

1  
2  
3 answer questions. This is a significant part of the work right now. Here too it is important to provide  
4 care for patients you know.  
5

6 *"...most of the time the consults are about a physical symptom...but when you ask a bit more you hear*  
7 *they are actually very worried..."*  
8

9  
10 *"Respiratory problems are common these days, often people have difficulties breathing because of*  
11 *fear or tension. The physiotherapists in our practice made a video to teach patients how to get control*  
12 *over their breathing again..."*  
13

14 Communication is affected in physical consults as well, because of protective measures which are  
15 taken.  
16

17  
18 *"We use the FFP2 masks and a special suit, this makes the consults less smooth and longer. Patients*  
19 *sometimes do not understand me and it is more difficult to show empathy with these masks..."*  
20  
21  
22  
23  
24  
25

### 26 **Theme 3 Problem solving skills**

27  
28 Clinical decision making is different and more difficult because less information can be obtained in  
29 telephone consultations. Mostly it is limited to questioning patients and their own examinations for  
30 instance their temperature or pulse rate. Furthermore, the changed epidemiology affects how  
31 symptoms are interpreted. Because there is a large focus on COVID-19, GPs think they will miss other  
32 diagnoses more frequently.  
33

34  
35 *"...I think serious conditions will be missed because we hardly examine people...for example, a*  
36 *bacterial pneumonia, which normally is treated with antibiotics...this will be labeled as a covid-case...*  
37 *or atrial fibrillation, which will not be detected on the phone..."*  
38  
39

40 Chronic problems are less well dealt with. Priority for COVID-19 pathology is one reason, and the fact  
41 that patients present less for their follow up is another. Patients with multimorbidity are at risk for  
42 COVID-19 complications, and a physical consult is a risk to be infected. Consults and home visits are  
43 reduced to a minimum, although GPs have difficulty in deciding which patient contacts can be  
44 postponed safely. Recurrent drug prescriptions can be sent straight to the pharmacist.  
45

46  
47 *"Patients seem to attend less for these (chronic) problems; they fear to take time from us in these*  
48 *busy days, or they are afraid to get infected..."*  
49

50  
51 *"...they postpone follow up consults for diabetes, because that's not really urgent...but I feel it is*  
52 *difficult to draw the line..."*  
53

54 Many GPs express their worry about this. It will result in a huge workload after the acute phase of  
55 this epidemic, and health problems due to suboptimal follow up are expected. They want to keep  
56 providing chronic care. Several GPs proactively make phone calls with their chronic patients if they  
57 are unable to do home visits or see them in their office.  
58  
59  
60

1  
2  
3 A similar phenomenon is observed for acute problems. People need to phone first, and many  
4 problems are dealt with by telephone. Patients seem to call less frequently for regular care. The  
5 number of regular consults is decreased by 70-80%. Furthermore, some diagnostics, such as non-  
6 urgent radiology, are not available now.  
7

8  
9 *"...I fear to see a lot of collateral damage after this crisis. We hardly see people with heart attacks.  
10 Where are they? .... Maybe they are afraid to consult us and to contract the virus. Or we have people  
11 on the phone with complaints, who don't want us to visit them, even if we think it is necessary..."*  
12

13  
14 *"...some problems are urgent, even in these exceptional times. Someone with a hearing aid who has a  
15 wax plug needs to be helped, this cannot wait. It is obvious that people still can come to us for that  
16 kind of care..."*  
17

18 Acute psychological care is difficult to organize. Telephone consultations are often not sufficient.  
19 Longer phone calls are planned at the end of the day. Some GPs, and some of the psychologists and  
20 psychiatrists they work with, offer video consultations.  
21

22  
23 Common, non-urgent problems have no priority these days. However, it sometimes is difficult to  
24 differentiate between urgent and non-urgent problems by telephone.  
25

#### 26 27 28 29 **Theme 4 Comprehensive care**

30  
31 The media are a dominant source for health advice and promotion concerning COVID-19. GPs feel  
32 they also have an important role providing and repeating advice. Information by the local or  
33 nationwide authorities is often used – GPs post this information on their website or send leaflets by  
34 email. GPs said patients will follow their advice more easily than advice in the media, and they can  
35 refine or nuance messages.  
36

37  
38 *"...there is clearly an oversupply of information, and some of it is incorrect...a big part of our job is to  
39 take away wrong ideas and to reassure people..."*  
40

41  
42 *"...next to the door handle I put a big arrow with the words "corona virus for free". We hammer home  
43 the message, sometimes with a bit of humor..."*  
44

45  
46 *"...when people are worried about the number of covid deaths, I try to put this in perspective. Using  
47 the website Worldometer I show them how many people die of smoking cigarettes, for example..."*  
48

49 Sources of information for health care providers are Sciensano (a public research institution  
50 dedicated to science and health), Domus Medica (the Flemish organisation of GPs), but also informal  
51 chat groups on social media.  
52

53  
54 *"There is a dedicated Facebook group for medical doctors in which 15000 doctors participate. This is a  
55 good source for information"*  
56

57 Some parts of comprehensive care get less attention or are no priority. Care for the elderly who live  
58 in nursing homes is not provided by GPs anymore. A coordinating physician in the nursing home  
59 takes up this task now. Restrictions exist for people in service flats. Prevention not linked to COVID-  
60

1  
2  
3 19 is no priority for most of the interviewees. Screening activities are suspended. Vaccinations in  
4 newborns and infants are still carried out.  
5  
6  
7  
8  
9

### 10 **Theme 5: Community orientation**

11  
12 In Belgium, employees who have to stay at home on sick leave, always need a certificate from a  
13 physician, which is often provided by the GP after consultation or home visit. During the COVID-19  
14 crisis, these certificates are to be provided without physical examination of the patient, which is  
15 highly uncommon.  
16

17  
18 Especially for this kind of work GPs describe their frustration as a feeling becoming an 'ink pad'. A  
19 large amount of their time goes to writing sick leave certificates, digital prescriptions, writing mails....  
20

21 *"We have become an ink pad now. Following each phone consultation we need to make sick leave*  
22 *notes and prescriptions, and then mail or fax them. We are constantly doing administrative work,*  
23 *which frustrates me and my colleagues..."*  
24

25  
26 GPs respect the guidelines to advise and prescribe patients to stay at home after a phone or physical  
27 consult when having covid-like symptoms. But more than before they think the system of sick leave  
28 notes should be reconsidered.  
29

30  
31 *"...I realize there always will be people who take advantage of the system. They existed before the*  
32 *epidemic as well. That is why I prefer the system in the Netherlands. They don't work with sick leave*  
33 *notes there..."*  
34

35  
36 *"..."Don't you want to write a certificate for the cancelling of my booked holiday?" ..." Can you make*  
37 *me a certificate that allows me to do home working?"...That is of course not our core business...*  
38

39  
40 Community orientation involves taking care of vulnerable and frail patients. Many GPs mention they  
41 proactively try to anticipate on certain problems in order to help people in and to coordinate actions  
42 where necessary.  
43

44 *"Our practice is making a list of vulnerable people and people at risk. People at risk are for example*  
45 *elderly, but also persons who still need to go to work. We ask them whether preventive measures (at*  
46 *work) are sufficient, if needed we refer them to the occupational physician. Vulnerable people are*  
47 *those who may get in trouble because of the lockdown measures. People with relational issues,*  
48 *difficult family situations, lonely people, people suffering from depression...The social worker will*  
49 *contact these people and if she thinks there is a need for supplementary counseling, she will refer*  
50 *them in order to help these people as well..."*  
51  
52  
53  
54

### 55 **Theme 6: Holistic view**

56  
57 GPs mention that a COVID-19 diagnosis is much more than a physical disease. It causes a lot of worry  
58 even in people with mild symptoms, who have an increased need for reassurance and information as  
59 compared to, for example, during an influenza epidemic.  
60

1  
2  
3 *"...we notice that many people – even when they are physically not very ill – suffer inner struggles. In*  
4 *circumstances like these you see that our society psychologically not is as healthy as you might think*  
5 *at first sight..."*  
6  
7

8 Most respondents are pleased with the way the government handles the epidemic. However, many  
9 worry about the psychosocial consequences of the outbreak, and more specifically about the  
10 lockdown measures to control it. Loneliness, depression, and intrafamilial violence are seen more  
11 frequently. Problems are also detected in persons who were previously in good mental health; some  
12 people are unable to cope with the new situation.  
13  
14

15 *"...for people with mental problems, like depression, it is very hard to have to stay at home all day and*  
16 *to be deprived from social contacts....families at risk for child or partner violence go through difficult*  
17 *times now..."*  
18  
19

20 *"...for example, one person of a couple lives in a home for the elderly, and her husband lives in a*  
21 *service flat in the same home, but they are not allowed to see each other anymore...that is very hard*  
22 *for them..."*  
23

24 Social and economic problems are just around the corner: children in vulnerable families will develop  
25 a learning deficit because distance learning does not fit them, and temporary unemployment and  
26 loss of income or jobs will influence health and welfare in the long term. These consequences may  
27 have been underestimated.  
28  
29

30 From an ecological perspective, this outbreak is no surprise for some GPs, it is seen as a natural  
31 biological process or a consequence of overcrowding and over-exploitation of the earth. According to  
32 some, the measures that are taken have a positive effect on nature.  
33  
34

35 *"...it is a good wake up call for everybody. Now we see clearly the effect of our behavior on nature;..."*  
36

37 Several times it was argued that in the management of this epidemic the remedy might be worse  
38 than the disease.  
39

40 *"Corona virus is for me the least of the problem, I know what it is and how to deal with it, rather it will*  
41 *be the consequences that can be dramatic."*  
42  
43

44 *"but it is now striking that the areas that did not work well are now in trouble. For example, the*  
45 *residential care centers where a lot has been saved, too few people and too few trained people are*  
46 *working, which makes the task even more difficult. This is also the case in the care for the disabled*  
47 *and in psychological care."*  
48  
49  
50  
51

## 52 **Theme 7: Self-protection and self-care**

53

54 In the early phase of the epidemic, it was hard to find personal protective equipment. Physicians got  
55 help from local pharmacists and industry. On a personal level GPs wear different combinations of  
56 mouth masks and/or gloves and/or glasses and/or protective aprons. Hand hygiene and social  
57 distancing are considered important as well. Many miss accurate information on how exactly they  
58 should protect themselves.  
59  
60



1  
2  
3 *“At home I put my clothes aside and take a shower after work. Most of these actions I had to find out*  
4 *by myself, the government has not really helped with this...”*  
5

6 *“In the end we managed to get a sufficient amount of masks for ourselves. And by now we received*  
7 *better masks as well. It is still difficult to get adequate equipment, for example protective aprons are*  
8 *a problem. Alcohol gel as well is a problem, but this has been solved with the help of local*  
9 *pharmacists and industry. And we managed to get disinfectant to clean the practice.”*  
10  
11

12 Many GPs are convinced they are at high risk to get infected. Most GPs do not experience a  
13 psychological burden applying to themselves, but rather worry about transmitting the infection to  
14 others. Furthermore, GPs worry about not being able to function anymore and adding extra work  
15 with their colleagues.  
16  
17

18 *“I wear, if necessary, a mask, glasses, etc...anyway there is a big chance I will contract it myself, but I*  
19 *am not afraid of it. I do am afraid of being an asymptomatic carrier and transmitting the virus to*  
20 *patients or at home...”*  
21  
22

23 *“There is the fear that if I would get infected, my colleague would have to do the work alone and all*  
24 *the burden will be on her shoulders. I want to avoid that...”*  
25

26 Another aspect of psychological burden for GPs is they cannot predict what to be expected in the  
27 coming period.  
28  
29

30 *“The burden of patients has actually decreased, but the tension is high. This is what makes it difficult*  
31 *in epidemic times. We don't know what will come, and which expectations we can/must have...”*  
32  
33  
34  
35  
36  
37  
38  
39  
40  
41  
42

## 43 **DISCUSSION**

44 Our interviews show that general practice reacted swiftly to the changed needs caused by the  
45 COVID-19 outbreak. Changes in practice management involved separating covid and non-covid flows,  
46 which was done both in individual practices and by means of ad hoc established specialized centers.  
47 Creative solutions for practice logistics were adopted. There was a major switch towards telephone  
48 triage and consults, for covid- as well as for non-covid related problems. GPs stated that telephone  
49 consults make communication difficult because of the loss of non-verbal language and because  
50 patients are not always able to express themselves sufficiently in a telephone call. However, the  
51 importance of patient-centered care is still felt, and they spend a considerable amount of time  
52 assessing fear, worry and questions besides the physical assessment. A pre-existent doctor-patient  
53 relationship is helpful in ensuring this aspect of general practice care. Clinical decision making is  
54 largely focused on respiratory assessment and triage, and they feel acute care is compromised, both  
55 by their own changed focus as by the fact that patients consult less frequently for non-covid  
56 problems. Chronic care is mostly postponed, and GPs fear this may have consequences that will  
57  
58  
59  
60

1  
2  
3 extend and become visible after the corona crisis. Comprehensive care includes prevention and  
4 health education, which are mainly focused on infectious diseases in this period, and in collaboration  
5 with local and global health authorities. Primary care practice is in this crisis very much community  
6 oriented, contributing to limiting the spread of the infection; on the other hand, the administrative  
7 burden related to sick leave is criticized a lot in these interviews. Through the holistic eyes of primary  
8 care, some doctors feel that if we succeed to flatten the infectious curve and preserve hospital  
9 facilities, society has done a tremendous job. However, the current outbreak as well as the measures  
10 taken to control it, will have a profound impact on psychological and socio-economic wellbeing. This  
11 impact is already visible in vulnerable people and will continue to become clear in the medium and  
12 long term. Possibly the side-effects of the cure will be worse than the disease.

13  
14  
15  
16 GPs protect themselves although, at least at the time the interviews were taken, PPE are scarce. They  
17 are inventive in trying to protect themselves but because of their frequent and close professional  
18 contact with potential carriers, many think they are at high risk to get infected. Dropping out and  
19 being unable to contribute their part or become a virus transmitter are reported to be greater  
20 concerns than getting ill themselves.  
21  
22

### 23 **Strengths and limitations**

24  
25 A major strength of this study is the large number of interviews that was obtained in a very short  
26 period. While GPs who experience a sudden rise in workload might not have been willing to spend  
27 some of their time for research, their solidarity with medical students, who need to get their credit  
28 while all their classes are suspended, turned out to be a strong motivator.

29  
30 Furthermore, we obtained a mix of interviewees, part of whom had a tradition of working with  
31 students as an internship motivator, and others who had no link at all with the educational or  
32 academic setting. We believe this blend explains the richness of data that was collected.

33  
34 Our study has some limitations because of the decisions we took on data collection and design. The  
35 interviewers were medical students who had no experience in interviewing. The interviews were not  
36 recorded, and the written reports made from them will reflect interpretations of the GPs' words by  
37 our students. However we organized member checking by giving GPs the opportunity to read and  
38 correct their statements in their interviews, which increased trustworthiness of the findings.  
39  
40  
41  
42  
43

### 44 **Comparison with literature findings**

45  
46 Primary care literature on the impact of the COVID-19 outbreak on primary care is still emerging; at  
47 present it mainly consists of practice guidelines, for example on telephone or video consulting(10-  
48 11). Reports on psychological(12) and socioeconomic repercussions(13) of lockdown measures  
49 present similar results and warnings as the ones our GPs expressed. Several reports(14,15) describe a  
50 profound effect of the outbreak on psychological well-being of health care professionals, in  
51 accordance with effects seen in previous outbreaks. This is not a factor that emerged clearly from our  
52 interviews, possibly because they were taken in the beginning of the epidemic but it shows we  
53 should be prepared to offer support services for medical care providers in the near future.  
54  
55  
56  
57  
58  
59  
60



### Implications for practice

These data, next to giving an insight in the way general practice has organized itself as a reaction to the COVID19 epidemic, reveal some sore points which will need to be addressed in this epidemic as well as in future infectious outbreaks. Medium- and long-term consequences of the fact that regular, non-COVID care is impaired while the focus of general practice in this stage is being put largely on triage and on managing respiratory pathology, are anticipated. Psychological and socio economic consequences are to be expected.

The perceived deficient self-protection for GPs is a consequence, not only of the lack of availability of PPE, but also of the specific general practice context. Although a well-protected environment is created in the physical triage centers, GPs continue to have close contacts with people with mild or no respiratory symptoms, who may as well be infected and contagious.

Administrative procedures, especially providing sick leave notes in the context of telephone consulting, was perceived as a burden and caused frustration. Alternative solutions should be considered for the future.

### Conclusion

General practitioners stand at the frontline in this coronavirus epidemic. Our study shows that the current times have a profound impact on the core competencies of GPs. They demonstrate a great flexibility and resilience when confronted with the challenges in the early phase of the epidemic. Although the vast increase in patients soliciting medical help and the necessary separate covid- and non-covid flows have been dealt with promptly, GPs are worried about the continuity of regular care and the consequences of the anti-covid measures. These may become a threat for the general health in the population and for the provision of primary health care in the near and further future. What does not kill you, makes you stronger, Nietzsche said more than a hundred years ago(16). According to our data COVID-19 has not been able to deprive primary care of its core characteristics; however whether it will come out of this crisis stronger, remains to be seen.

**Author statement:** all authors (VV, GT, HP, PVR) have been involved in the design, analysis and writing of this paper. During the formal analysis, the first author took the lead with support of both co-authors. The first author made the first draft of the paper after which the other authors revised the entire. The first author is the guarantor. The corresponding author attests that all listed authors meet authorship criteria and that no others meeting the criteria have been omitted.

**Data statement:** requests for accessing our original data can be addressed to the corresponding author.

**Funding:** no funding.

**Competing interests declaration:** All authors declare they have no competing interests.

**Acknowledgements:** We thank all 132 GPs who took the time to give an interview during busy times.

**REFERENCES**

- 1 JH, Hayasaki E, Zastrow M, Pulla P, et al. Covid-19: how doctors and healthcare systems are tackling coronavirus worldwide. *BMJ* 2020;368:m1090
- 2 van Olmen J, Remmen R, Van Royen P, et al. Regional coordination and bottom-up response of general practitioners in Belgium and the Netherlands. *BMJ* 2020;369:m1377. doi: 10.1136/bmj.m1377
- 3 Morreel S, Philips H, Verhoeven V. Organisation and characteristics of out-of-hours primary care during a COVID-19 outbreak. In press.
- 4 Allen J, Gay B, Crebolder H, et al. The European definitions of the key features of the discipline of general practice: the role of the GP and core competencies. *Br J Gen Pract.* 2002;52:526-7
- 5 Wonca-Europe definition of Family Medicine. 3rd edition 2011. <http://www.woncaeurope.org/> (accessed 18th April 2020)
- 6 Hummers-Pradier E, Beyer M, Chevallier P, et al. The Research Agenda for General Practice/Family Medicine and Primary Health Care in Europe. Part 1. Background and methodology. *Eur J Gen Pract.* 2009;15:243-50. doi: 10.3109/13814780903452184.
- 7 Braun V, Clarke V. Using thematic analysis in psychology. *Qual Res Psychol.* 2006;3:77–101. doi: 10.1191/1478088706qp063oa.
- 8 Ritchie J, Spencer L. Qualitative data analysis for applied policy research. In: Bryman A, Burgess R, editors. *Analyzing qualitative data.* London: Routledge; 1993:173–194.
9. Korstjens I, Moser A. Series: Practical guidance to qualitative research. Part 4: trustworthiness and publishing. *Eur J Gen Pract.* 2018;24:1–5. doi: 10.1080/13814788.2017.1375092.
10. Greenhalgh T, Koh GCH, Car J Covid-19: a remote assessment in primary care. *BMJ* 2020; 368 doi: <https://doi.org/10.1136/bmj.m1182>
11. Greenhalgh T, Wherton J, Shaw S, Morrison C. Video consultations for covid-19. *BMJ* 2020;368:m998 doi: 10.1136/bmj.m998
12. Losada-Baltar A, Jiménez-Gonzalo L, Gallego-Alberto L, et al. "We're staying at home". Association of self-perceptions of aging, personal and family resources and loneliness with psychological distress during the lock-down period of COVID-19. *J Gerontol B Psychol Sci Soc Sci.* 2020 pii: gbaa048. doi: 10.1093/geronb/gbaa048
13. Chung RY, Dong D, Li MM. Socioeconomic gradient in health and the covid-19 outbreak. *BMJ* 2020; 369 doi: <https://doi.org/10.1136/bmj.m1329>
14. Lu W, Wang H, Lin Y, Li L. Psychological status of medical workforce during the COVID-19 pandemic: A cross-sectional study. *Psychiatry Res.* 2020;288:112936. doi: 10.1016/j.psychres.2020.112936

1  
2  
3 15. Kang L, Ma S, Chen M, et al. Impact on mental health and perceptions of psychological care  
4 among medical and nursing staff in Wuhan during the 2019 novel coronavirus disease outbreak: A  
5 cross-sectional study. *Brain Behav Immun*. 2020 pii: S0889-1591(20)30348-2. doi:  
6 10.1016/j.bbi.2020.03.028  
7

8  
9 16. Nietzsche F. *Twilight of the Idols: or How to Philosophize with a Hammer* (Oxford World's  
10 Classics). Publisher: Oxford University Press, 1998. ISBN 10: 0192831380  
11  
12  
13  
14  
15  
16  
17  
18  
19  
20  
21  
22  
23  
24  
25  
26  
27  
28  
29  
30  
31  
32  
33  
34  
35  
36  
37  
38  
39  
40  
41  
42  
43  
44  
45  
46  
47  
48  
49  
50  
51  
52  
53  
54  
55  
56  
57  
58  
59  
60

For peer review only

Figure 1: Core competencies in general practice (WONCA definition)(4,5)

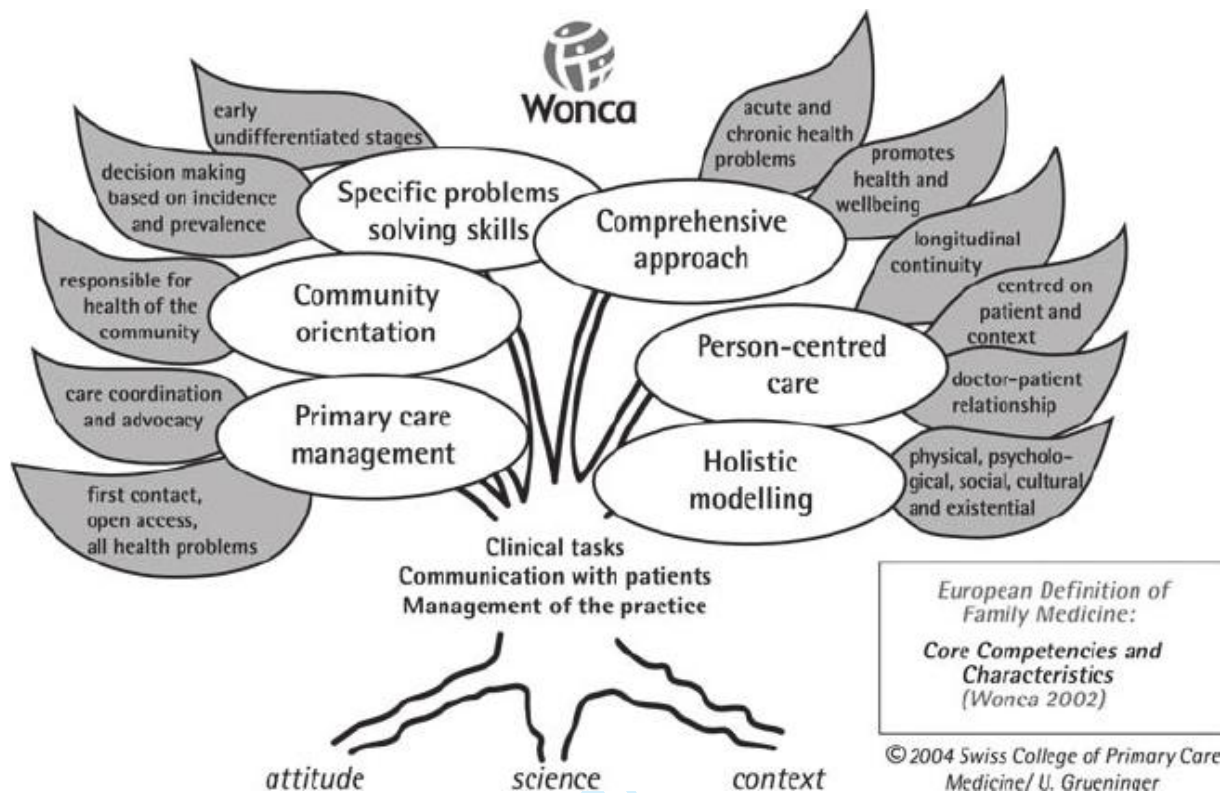

## Supplementary file: Interview guide

1. How was **practice management** modified in the context of COVID-19; how is the collaboration with colleagues/the hospital organized? What is the change in workload? To what extent are telephone consults adopted and what is their impact on practice management?
2. How is **person-centred care** affected? Can this aspect of care be preserved in telephone consultations? Is attention paid/time available to address worries, fear of patients or is the estimation of physical illness primordial?
3. How is decision making influenced in consults for **acute, non-COVID or chronic problems**?
4. How does a **comprehensive approach** involve COVID-specific risk management and health education?
5. Concerning **community orientation**, how is dealt with the contagious aspect and with the need for illness certificates for school and work?
6. Which broader, **holistic view** does the GP have on the outbreak and management of an epidemic such as COVID19?
7. How does the GP **protect himself** against infection during his work with infected or possibly infected patients?

# Reporting checklist for qualitative study.

Based on the SRQR guidelines.

## Instructions to authors

Complete this checklist by entering the page numbers from your manuscript where readers will find each of the items listed below.

Your article may not currently address all the items on the checklist. Please modify your text to include the missing information. If you are certain that an item does not apply, please write "n/a" and provide a short explanation.

Upload your completed checklist as an extra file when you submit to a journal.

In your methods section, say that you used the SRQR reporting guidelines, and cite them as:

O'Brien BC, Harris IB, Beckman TJ, Reed DA, Cook DA. Standards for reporting qualitative research: a synthesis of recommendations. Acad Med. 2014;89(9):1245-1251.

|              |                                                                                                                                                                                                                                                                | Page   |
|--------------|----------------------------------------------------------------------------------------------------------------------------------------------------------------------------------------------------------------------------------------------------------------|--------|
|              | Reporting Item                                                                                                                                                                                                                                                 | Number |
| <b>Title</b> | <p><a href="#">#1</a> Concise description of the nature and topic of the study identifying the study as qualitative or indicating the approach (e.g. ethnography, grounded theory) or data collection methods (e.g. interview, focus group) is recommended</p> | 1      |

**Abstract**

2

[#2](#) Summary of the key elements of the study using the abstract format of the intended publication; typically includes background, purpose, methods, results and conclusions

**Introduction**

3

## Problem formulation

[#3](#) Description and significance of the problem / phenomenon studied: review of relevant theory and empirical work; problem statement

## Purpose or research question

[#4](#) Purpose of the study and specific objectives or questions

3

**Methods**

## Qualitative approach and research paradigm

[#5](#) Qualitative approach (e.g. ethnography, grounded theory, case study, phenomenology, narrative research) and guiding theory if appropriate; identifying the research paradigm (e.g. postpositivist, constructivist / interpretivist) is also recommended; rationale. The rationale should briefly discuss the justification for choosing that theory, approach, method or technique rather than other options available; the assumptions and limitations implicit in those choices and how those choices influence study conclusions and transferability.

4

As appropriate the rationale for several items might be discussed together.

|    |                           |                     |   |
|----|---------------------------|---------------------|---|
| 1  |                           |                     |   |
| 2  |                           |                     |   |
| 3  |                           |                     |   |
| 4  |                           |                     |   |
| 5  |                           |                     |   |
| 6  | Researcher                | <a href="#">#6</a>  | 4 |
| 7  |                           |                     |   |
| 8  | characteristics and       |                     |   |
| 9  |                           |                     |   |
| 10 | reflexivity               |                     |   |
| 11 |                           |                     |   |
| 12 |                           |                     |   |
| 13 |                           |                     |   |
| 14 |                           |                     |   |
| 15 |                           |                     |   |
| 16 |                           |                     |   |
| 17 |                           |                     |   |
| 18 |                           |                     |   |
| 19 |                           |                     |   |
| 20 |                           |                     |   |
| 21 |                           |                     |   |
| 22 | Context                   | <a href="#">#7</a>  | 4 |
| 23 |                           |                     |   |
| 24 |                           |                     |   |
| 25 | Sampling strategy         | <a href="#">#8</a>  | 4 |
| 26 |                           |                     |   |
| 27 |                           |                     |   |
| 28 |                           |                     |   |
| 29 |                           |                     |   |
| 30 |                           |                     |   |
| 31 |                           |                     |   |
| 32 |                           |                     |   |
| 33 |                           |                     |   |
| 34 |                           |                     |   |
| 35 | Ethical issues pertaining | <a href="#">#9</a>  | 4 |
| 36 |                           |                     |   |
| 37 | to human subjects         |                     |   |
| 38 |                           |                     |   |
| 39 |                           |                     |   |
| 40 |                           |                     |   |
| 41 |                           |                     |   |
| 42 |                           |                     |   |
| 43 |                           |                     |   |
| 44 |                           |                     |   |
| 45 | Data collection methods   | <a href="#">#10</a> | 4 |
| 46 |                           |                     |   |
| 47 |                           |                     |   |
| 48 |                           |                     |   |
| 49 |                           |                     |   |
| 50 |                           |                     |   |
| 51 |                           |                     |   |
| 52 |                           |                     |   |
| 53 |                           |                     |   |
| 54 |                           |                     |   |
| 55 |                           |                     |   |
| 56 |                           |                     |   |
| 57 |                           |                     |   |
| 58 |                           |                     |   |
| 59 |                           |                     |   |
| 60 |                           |                     |   |



|    |                         |                     |                                                          |      |
|----|-------------------------|---------------------|----------------------------------------------------------|------|
| 1  | Data collection         | <a href="#">#11</a> | Description of instruments (e.g. interview guides,       | 4    |
| 2  |                         |                     | questionnaires) and devices (e.g. audio recorders)       |      |
| 3  | instruments and         |                     | used for data collection; if / how the instruments(s)    |      |
| 4  |                         |                     | changed over the course of the study                     |      |
| 5  | technologies            |                     |                                                          |      |
| 6  |                         |                     |                                                          |      |
| 7  |                         |                     |                                                          |      |
| 8  |                         |                     |                                                          |      |
| 9  |                         |                     |                                                          |      |
| 10 |                         |                     |                                                          |      |
| 11 | Units of study          | <a href="#">#12</a> | Number and relevant characteristics of participants,     | 4    |
| 12 |                         |                     | documents, or events included in the study; level of     |      |
| 13 |                         |                     | participation (could be reported in results)             |      |
| 14 |                         |                     |                                                          |      |
| 15 |                         |                     |                                                          |      |
| 16 |                         |                     |                                                          |      |
| 17 |                         |                     |                                                          |      |
| 18 |                         |                     |                                                          |      |
| 19 | Data processing         | <a href="#">#13</a> | Methods for processing data prior to and during          | 4    |
| 20 |                         |                     | analysis, including transcription, data entry, data      |      |
| 21 |                         |                     | management and security, verification of data integrity, |      |
| 22 |                         |                     | data coding, and anonymisation / deidentification of     |      |
| 23 |                         |                     | excerpts                                                 |      |
| 24 |                         |                     |                                                          |      |
| 25 |                         |                     |                                                          |      |
| 26 |                         |                     |                                                          |      |
| 27 |                         |                     |                                                          |      |
| 28 |                         |                     |                                                          |      |
| 29 |                         |                     |                                                          |      |
| 30 |                         |                     |                                                          |      |
| 31 | Data analysis           | <a href="#">#14</a> | Process by which inferences, themes, etc. were           | 4    |
| 32 |                         |                     | identified and developed, including the researchers      |      |
| 33 |                         |                     | involved in data analysis; usually references a specific |      |
| 34 |                         |                     | paradigm or approach; rationale                          |      |
| 35 |                         |                     |                                                          |      |
| 36 |                         |                     |                                                          |      |
| 37 |                         |                     |                                                          |      |
| 38 |                         |                     |                                                          |      |
| 39 |                         |                     |                                                          |      |
| 40 |                         |                     |                                                          |      |
| 41 | Techniques to enhance   | <a href="#">#15</a> | Techniques to enhance trustworthiness and credibility    | 4    |
| 42 |                         |                     | of data analysis (e.g. member checking, audit trail,     |      |
| 43 | trustworthiness         |                     | triangulation); rationale                                |      |
| 44 |                         |                     |                                                          |      |
| 45 |                         |                     |                                                          |      |
| 46 |                         |                     |                                                          |      |
| 47 |                         |                     |                                                          |      |
| 48 | <b>Results/findings</b> |                     |                                                          |      |
| 49 |                         |                     |                                                          |      |
| 50 |                         |                     |                                                          |      |
| 51 | Syntheses and           | <a href="#">#16</a> | Main findings (e.g. interpretations, inferences, and     | 4-11 |
| 52 |                         |                     | themes); might include development of a theory or        |      |
| 53 | interpretation          |                     | model, or integration with prior research or theory      |      |
| 54 |                         |                     |                                                          |      |
| 55 |                         |                     |                                                          |      |
| 56 |                         |                     |                                                          |      |
| 57 |                         |                     |                                                          |      |
| 58 |                         |                     |                                                          |      |
| 59 |                         |                     |                                                          |      |
| 60 |                         |                     |                                                          |      |

|    |                              |                     |                                                          |       |
|----|------------------------------|---------------------|----------------------------------------------------------|-------|
| 1  | Links to empirical data      | <a href="#">#17</a> | Evidence (e.g. quotes, field notes, text excerpts,       | 4-11  |
| 2  |                              |                     | photographs) to substantiate analytic findings           |       |
| 3  |                              |                     |                                                          |       |
| 4  |                              |                     |                                                          |       |
| 5  |                              |                     |                                                          |       |
| 6  | <b>Discussion</b>            |                     |                                                          |       |
| 7  |                              |                     |                                                          |       |
| 8  |                              |                     |                                                          |       |
| 9  |                              |                     |                                                          |       |
| 10 | Intergration with prior      | <a href="#">#18</a> | Short summary of main findings; explanation of how       | 13-14 |
| 11 | work, implications,          |                     | findings and conclusions connect to, support, elaborate  |       |
| 12 |                              |                     | on, or challenge conclusions of earlier scholarship;     |       |
| 13 | transferability and          |                     | discussion of scope of application / generalizability;   |       |
| 14 |                              |                     | identification of unique contributions(s) to scholarship |       |
| 15 | contribution(s) to the field |                     | in a discipline or field                                 |       |
| 16 |                              |                     |                                                          |       |
| 17 |                              |                     |                                                          |       |
| 18 |                              |                     |                                                          |       |
| 19 |                              |                     |                                                          |       |
| 20 |                              |                     |                                                          |       |
| 21 |                              |                     |                                                          |       |
| 22 |                              |                     |                                                          |       |
| 23 |                              |                     |                                                          |       |
| 24 | Limitations                  | <a href="#">#19</a> | Trustworthiness and limitations of findings              | 13    |
| 25 |                              |                     |                                                          |       |
| 26 |                              |                     |                                                          |       |
| 27 | <b>Other</b>                 |                     |                                                          |       |
| 28 |                              |                     |                                                          |       |
| 29 |                              |                     |                                                          |       |
| 30 | Conflicts of interest        | <a href="#">#20</a> | Potential sources of influence of perceived influence on | 15    |
| 31 |                              |                     | study conduct and conclusions; how these were            |       |
| 32 |                              |                     | managed                                                  |       |
| 33 |                              |                     |                                                          |       |
| 34 |                              |                     |                                                          |       |
| 35 |                              |                     |                                                          |       |
| 36 |                              |                     |                                                          |       |
| 37 |                              |                     |                                                          |       |
| 38 | Funding                      | <a href="#">#21</a> | Sources of funding and other support; role of funders in | 15    |
| 39 |                              |                     | data collection, interpretation and reporting            |       |
| 40 |                              |                     |                                                          |       |
| 41 |                              |                     |                                                          |       |
| 42 |                              |                     |                                                          |       |

None The SRQR checklist is distributed with permission of Wolters Kluwer © 2014 by the Association of American Medical Colleges. This checklist can be completed online using <https://www.goodreports.org/>, a tool made by the [EQUATOR Network](#) in collaboration with [Penelope.ai](#)

# BMJ Open

**Impact of the COVID-19 pandemic on the core functions of primary care: will the cure be worse than the disease?  
A qualitative interview study in Flemish GPs.**

|                                 |                                                                                                                                                                                                                                                                                                                                                                  |
|---------------------------------|------------------------------------------------------------------------------------------------------------------------------------------------------------------------------------------------------------------------------------------------------------------------------------------------------------------------------------------------------------------|
| Journal:                        | <i>BMJ Open</i>                                                                                                                                                                                                                                                                                                                                                  |
| Manuscript ID                   | bmjopen-2020-039674.R1                                                                                                                                                                                                                                                                                                                                           |
| Article Type:                   | Original research                                                                                                                                                                                                                                                                                                                                                |
| Date Submitted by the Author:   | 25-May-2020                                                                                                                                                                                                                                                                                                                                                      |
| Complete List of Authors:       | Verhoeven, Veronique; University of Antwerp, Primary and interdisciplinary care<br>Tsakitzidis, Giannoula; University of Antwerp, Department of Primary and Interdisciplinary Care<br>Philips, Hilde; University of Antwerp, Primary and Interdisciplinary Care<br>Van Royen, Paul; Universiteit van Antwerpen, Decanaat Geneeskunde en Gezondheidswetenschappen |
| <b>Primary Subject Heading</b>: | General practice / Family practice                                                                                                                                                                                                                                                                                                                               |
| Secondary Subject Heading:      | Health services research                                                                                                                                                                                                                                                                                                                                         |
| Keywords:                       | PRIMARY CARE, Organisation of health services < HEALTH SERVICES ADMINISTRATION & MANAGEMENT, QUALITATIVE RESEARCH                                                                                                                                                                                                                                                |
|                                 |                                                                                                                                                                                                                                                                                                                                                                  |

SCHOLARONE™  
Manuscripts



I, the Submitting Author has the right to grant and does grant on behalf of all authors of the Work (as defined in the below author licence), an exclusive licence and/or a non-exclusive licence for contributions from authors who are: i) UK Crown employees; ii) where BMJ has agreed a CC-BY licence shall apply, and/or iii) in accordance with the terms applicable for US Federal Government officers or employees acting as part of their official duties; on a worldwide, perpetual, irrevocable, royalty-free basis to BMJ Publishing Group Ltd ("BMJ") its licensees and where the relevant Journal is co-owned by BMJ to the co-owners of the Journal, to publish the Work in this journal and any other BMJ products and to exploit all rights, as set out in our [licence](#).

The Submitting Author accepts and understands that any supply made under these terms is made by BMJ to the Submitting Author unless you are acting as an employee on behalf of your employer or a postgraduate student of an affiliated institution which is paying any applicable article publishing charge ("APC") for Open Access articles. Where the Submitting Author wishes to make the Work available on an Open Access basis (and intends to pay the relevant APC), the terms of reuse of such Open Access shall be governed by a Creative Commons licence – details of these licences and which [Creative Commons](#) licence will apply to this Work are set out in our licence referred to above.

Other than as permitted in any relevant BMJ Author's Self Archiving Policies, I confirm this Work has not been accepted for publication elsewhere, is not being considered for publication elsewhere and does not duplicate material already published. I confirm all authors consent to publication of this Work and authorise the granting of this licence.

1  
2  
3 **Impact of the COVID-19 pandemic on the core functions of primary care: will**  
4 **the cure be worse than the disease?**

5  
6 **A qualitative interview study in Flemish GPs.**  
7  
8  
9

10  
11  
12  
13  
14  
15 **Authors:**  
16

17 Veronique Verhoeven, Professor Department of primary and interdisciplinary care, University of  
18 Antwerp

19 Giannoula Tsakitzidis, Post-doc Researcher Department of primary and interdisciplinary care,  
20 University of Antwerp  
21

22 Hilde Philips, Professor Department of primary and interdisciplinary care, University of Antwerp

23 Paul Van Royen, Professor Department of primary and interdisciplinary care, University of Antwerp  
24

25  
26 Corresponding author: Veronique.verhoeven@uantwerpen.be +32 (0) 3 265 25 18

27 Address for all authors: University of Antwerp, Faculty of Medicine and Health Sciences , Department  
28 of Primary and Interdisciplinary Care, Gouverneur Kinsbergen Centrum, Doornstraat 331, 2610  
29 Antwerpen, Belgium  
30  
31

32  
33  
34 Word count: 5622  
35

36 Keywords: COVID-19, SARS-CoV-2, Primary Care, General Practice, Organisation of health care  
37  
38  
39  
40  
41  
42  
43  
44  
45  
46  
47  
48  
49  
50  
51  
52  
53  
54  
55  
56  
57  
58  
59  
60

**ABSTRACT**

**OBJECTIVES:** The current COVID-19 pandemic, as well as the measures taken to control it, have a profound impact on healthcare. This study was set up to gain insights into the consequences of the COVID-19 outbreak on the core competencies of general practice, as they are experienced by GPs on the frontline.

**DESIGN, SETTING, PARTICIPANTS:** We performed a descriptive study using semi-structured interviews with 132 GPs, using a topic list based on the WONCA definition of core competencies in general practice. Data were analysed qualitatively using framework analysis.

**RESULTS:** Changes in practice management and in consultation strategies were quickly adopted. There was a major switch towards telephone triage and consults, for covid- as well as for non-covid related problems. Patient-centered care is still a major objective. Clinical decision-making is largely focused on respiratory assessment and triage, and GPs feel that acute care is compromised, both by their own changed focus and by the fact that patients consult less frequently for non-covid problems. Chronic care is mostly postponed, and this will have consequences that will extend and become visible after the corona crisis. Through the holistic eyes of primary care, the current outbreak - as well as the measures taken to control it - will have a profound impact on psychological and socio-economic wellbeing. This impact is already visible in vulnerable people and will continue to become clear in the medium and long term. Possibly the side-effects of the cure will be worse than the disease. GPs think that they are at high risk of getting infected. Dropping out and being unable to contribute their part or becoming virus transmitters are reported to be greater concerns than getting ill themselves.

**CONCLUSIONS:** The current times have a profound impact on the core competences of primary care. Although the vast increase in patients soliciting medical help and the necessary separate covid- and non-covid flows have been dealt with, GPs are worried about the continuity of regular care and the consequences of the anti-covid measures. These may become a threat for the general health of the population and for the provision of primary health care in the near and distant future.

**INTERVENTIONS:**N/A

**PRIMARY AND SECONDARY OUTCOME MEASURES:** N/A

**Strengths and limitations summary**

strength: °large number of interviews in the hectic early phase of the outbreak

strength: °large variation in our GPs' sample, leading to rich data

strength: °first article of its kind that we are aware of

limitation: °interview reports may reflect interviewers' interpretations

limitation: °interviewers were medical students

## INTRODUCTION

The current COVID-19 pandemic puts a previously unseen stress on the organisation of healthcare. In several countries the demand for medical care exceeds the available resources, urging stakeholders to reorganise the medical landscape(1). Chronic and non-urgent care in hospitals have been largely suspended to increase the capacity of emergency and respiratory care.

On 16<sup>th</sup> March 2020, the Belgian government rolled out an emergency plan for general practice, in which telephone triage was defined as the primary means of COVID-19 triage, and in which the establishment of physical triage centres was mandated. These centres are accessible after telephone triage, and have a threefold goal: 1) to create a safe environment for general practitioners (GPs) to examine patients with suspected COVID-19 pathology; 2) to ascertain an optimal use of the scarce PPE (personal protection equipment) resources, and 3) to avoid congestion at emergency departments by diverting into these triage centres.

The emergency plan led to a quick rise of “corona centres”, largely initiated by local GPs’ teams and often organised within the structure of existing out-of-hours General Practice Cooperatives(2). The centres are manned 7/7 by a rotation of mainly GPs in the neighbourhood.

Evidently, these measures have a profound impact on primary care – an impact which extends far beyond the organisational and logistic level(3). Primary care is the first point of contact for patients with symptoms, worries, anxiety and questions concerning the epidemic. In the meantime, regular health problems do not cease to exist.

This COVID-19 outbreak is a challenge for each of the GP’s core competencies, as they are described in the European definition of General Practice, revised in 2005 and 2011 (WONCA, 2011)(4,5).

*Primary care management* requires solutions to tackle the increased number of patient contacts and to separate covid – and non-covid flows. *Person-centered care* needs to be maintained in the shift to telephone consultations. *Decision-making skills* must account for the changed epidemiology and the need for regular and covid-related care. A *comprehensive approach* includes covid-specific risk management and health education. *Community orientation* is evidently extremely important in the context of an infectious outbreak, and, finally, psychological, socio-cultural, and existential dimensions define the *holistic context* in which the GP operates.

Evaluation of health care system responses to earlier infectious pandemics shows various approaches and different levels of involvement of primary care in different countries, but generally a non-optimal preparedness(6-8). Difficulties in supply and use of personal protection equipment (PPE), healthcare decisions such as prioritisation of high-risk patients, support from authorities, lack of knowledge and training, and the emotional burden, are factors that compromise an effective response to a pandemic. In past years, various and divergent preparedness plans have been developed in different countries(9). Data from the ongoing pandemic can help in tailoring strategies for the future.

Therefore, this interview study aims to gain qualitative insights into the consequences of the COVID-19 outbreak on the core competencies of general practice, as they are experienced by GPs in the field. The interviews were taken in the early phase of the outbreak, in a time when a new routine was not yet established.

## METHODS

### Setting and participants

Semi-structured interviews were conducted by medical students in the 3<sup>rd</sup> year of their bachelor's degree, between 24 - 31 March. These students saw their planned family medicine internship cancelled because of the current pandemic; the interview served as an assignment replacing their internship. One hundred and thirty-two students conducted 132 interviews with GPs in the field in Flanders, all working as GPs in the Flemish part of Belgium, in an inner city, suburban, or rural, context. Participants were the original internship supervisors (academic and non-academic). Because some of them had time constraints or had several students in their practice, we recruited 38 GPs and 9 GP trainees *ad hoc* through social media (a private physicians' group on Facebook sharing information on COVID-19).

### Data collection and analysis

We used an interview guide (see supplementary file) which was based on the core competencies of the general practitioner in the European definition of General Practice(4). Since the six core competencies were previously used to build up a research agenda for primary care(10), this framework was a good starting point for the topic list and further thematic analysis. In addition to the six questions based on the core competencies, GPs were asked what measures they took to protect themselves against COVID-19 during their work. Each student conducted one interview by telephone or video call, on a moment beforehand agreed with the GP. Some interviews were recorded. A written report of the interview, containing a transcript or synopsis of the answers of each GP as well as demographic data of the GP, was made by the interviewer and then sent to the individual GP, who checked it for accuracy and completeness.

An inductive framework analysis approach was used to analyse data(11,12). One author independently categorised and coded initial transcripts of ten interviews and developed a draft coding framework which was then discussed and agreed by the rest of the team. The remaining interviews were then analysed by the research team using this framework, while changes and additions were made when other themes emerged. The research team was multidisciplinary and consisted of academic GPs and a physiotherapist, internship supervisors and qualitative research experts. All of them reviewed and discussed the coding on several occasions using investigators' triangulation, in order to reach consensus about the interpretation and to enhance trustworthiness of the process(13).

Data sufficiency was reached after 59 interviews, giving enough richness and depth of the data. The rest of the already performed 132 interviews were reviewed as well, they revealed sometimes a more illustrative quote but no new data.

We used the SRQR reporting guidelines as a checklist for writing this report(14).

### Ethical considerations

The ethics committee of the University of Antwerp – Antwerp University Hospital granted ethics approval for the study (ref20/15/187). Participants gave written informed consent by email for the interviews.



## Patient and public involvement

No patients involved.

## RESULTS

The characteristics of participants are shown in table 1. Fourteen of the original internship supervisors dropped out because of time constraints or illness and were replaced by another GP. A mix of internship supervisors, academics, and GPs affiliated to university was obtained. Mean duration of the interviews was 26minutes (range 15-60 min, SD = 9 min).

Table 1: Characteristics of interviewees

|                                |                               |
|--------------------------------|-------------------------------|
| Mean age (SD, range)           | 41,88 (SD 12.53; range 24-67) |
| <i>Gender</i>                  |                               |
| M                              | 51                            |
| F                              | 81                            |
| <i>Network</i>                 |                               |
| Academic                       | 11                            |
| Internship supervisor network  | 74                            |
| Recruited through social media | 38                            |
| GP trainee                     | 9                             |
| <i>Type of GP practice</i>     |                               |
| Solo                           | 15                            |
| Group                          | 111                           |
| Community Health Centre        | 4                             |
| Not known                      | 2                             |
| <i>Practice location</i>       |                               |
| Inner city                     | 43                            |
| Suburban                       | 59                            |
| Rural                          | 27                            |
| Not known                      | 3                             |

We defined seven main themes, of which the first six coincide with the primary care core competencies. A seventh theme about personal protection was added in the current context of the COVID-19 outbreak.

### Theme 1: Primary care management

Within this theme GPs explain what adjustments they have applied to cope with the governmental guidelines regarding COVID-19. They collaborate with the above described "corona centres" to separate covid- and non-covid flows. The primary contact with patients is now by telephone. Online

1  
2  
3 agendas where people can take an appointment are closed or, if possible, restructured, to  
4 discriminate between respiratory and other complaints.  
5

6 *"...all ill people with possible symptoms of the contagious coronavirus, like cough or fever, are kept*  
7 *out of our practice. This means that these days we hardly have patient visits at our practice. Patients*  
8 *with a possible infection are sent to a regional triage centre" (GP24)*  
9

10  
11 *" we only see acute patients without upper respiratory complaints, so we do not put other patients in*  
12 *danger. We do not work online anymore for appointments or open consultations" (GP4)*  
13

14 This means that they see few people per day face to face, only those with acute non-covid problems;  
15 the work is different in these circumstances. GPs start early with phone calls, adjusting their website,  
16 reading the news and relevant papers to stay informed. There is more administrative workload than  
17 usual. Some GPs perceive the workload as higher because of the phone calls and the need to stay  
18 informed, and others perceive it as lower because of the drop in physical consultations.  
19

20  
21  
22 *"...The workload is different from the usual: you need to start earlier, make a lot of phone calls, send*  
23 *emails in between, try to keep up to date by reading a lot, adjust your website...so you're busy the*  
24 *whole day...." (GP18)*  
25

26 Many GPs mention more structured working schedules within their practice. Agreements are made  
27 to divide and reallocate jobs for telephone triage, telephone consultations, face to face consultations  
28 and working in the "corona centres" .....

29  
30  
31 *"...the older doctors in our practice focus on the telephone consultations, to minimise the risk for*  
32 *them..." (GP9)*  
33

34 *"Our GPs and the trainee work at the moment in shifts of four hours. Where possible, the nurse*  
35 *participates in telephone triage. Her tasks are now mainly replaced by helping to deal with the flood*  
36 *of phone calls...." (GP31)*  
37  
38

39 Meetings with other GPs were set up to choose the procedures for self-protection and material, and  
40 to decide what to do to guarantee continuity of care.  
41

42  
43 *"...If a colleague drops out because of illness, he has to notify the coordinating GP in the region, that*  
44 *way a solution is sought to try to guarantee continuity by GPs in the neighbourhood..." (GP36)*  
45

46 The impact of the decrease in physical consultations on GPs' income is obvious, as in Belgium GPs  
47 work mainly in a fee-for-service system. Some doctors have developed a system for this to be paid  
48 per every shift worked, regardless of the tasks performed. This change is welcome because mainly  
49 making phone calls and doing administrative work is frustrating for many. Furthermore, health  
50 insurance now reimburses phone consultations within certain limits, which was not the case before  
51 COVID-19 outbreak.  
52

53  
54 *"Normally GPs work in a fee-for-service system, but now everything is pooled. All incomes are divided*  
55 *by the number of shifts a doctor works. Thus doctors are paid for each shift, including for the other*  
56 *tasks that are normally not seen as a paid service. Because the load of administrative work is*  
57 *sometimes quite frustrating, this change is more than welcome..." (GP27)*  
58  
59  
60

1  
2  
3 Measures are taken within the practices to make them more “infection-proof” to keep performing  
4 regular care, such as removing unnecessary materials in waiting or consultation rooms. The number  
5 of patients in the waiting room is limited, or patients are asked to await their turn in their car.  
6  
7

8 *“...The door of the waiting room has been removed...” (GP52)*

9  
10 *“...The practice has plexiglass now at the doctor’s desk, the patient can sit on the other side....” (GP3)*

11  
12 *‘All non-necessary materials were removed from the consultation room to prevent contamination and*  
13 *spoilage of consumables.’ (GP72)*  
14

15 Collaboration in primary care with psychologists, psychiatrists, is more intense than usual, and this is  
16 considered as very important in these circumstances.  
17

18  
19 *“It is important to stress that there is a lot of solidarity between the different health care providers. A*  
20 *psychologist contacted me because she wanted to help with the care of anxious patients, that way*  
21 *the task of reassuring people can be taken over” (GP41)*  
22

23 The corona epidemic also has an effect on the collaboration with other medical specialists. Some  
24 specialists seem to have more time to exchange information in more depth and this facilitates  
25 collaboration, but for non-urgent care the collaboration is less satisfactory.  
26  
27

28 *“Specialists have more time now, they also had to cancel all their appointments...now they are more*  
29 *helpful and approachable because they are less busy, and the collaboration with the GP is smoother*  
30 *than usual...” (GP89)*  
31

32  
33 *“All non-urgent care has been cancelled, so the patient automatically ends up with his GP again. This*  
34 *of course affects the workload.(GP30)*  
35

## 40 **Theme 2: Person-Centered care**

41  
42  
43 The switch towards telephone consultations makes the job more difficult for most GPs. The loss of  
44 non-verbal communication, the lack of articulacy in some patients, intercultural communication and  
45 associated language problems are mentioned as barriers.  
46  
47

48 *“...in the beginning I needed to get used to it, because for a GP body language is very*  
49 *important....and in our region there are lots of different cultures and languages, so you need to try to*  
50 *explain them in German or English or French, and you don’t really know if they understand....”(GP22)*  
51

52 Having their own, known patients on the phone is a huge advantage; telephone calls with patients  
53 that are not their own are much more difficult. Facilitators are using the ICE frame (ideas, concerns,  
54 expectations), and the implementation of video consultations. Still, these novel ways of working  
55 cause stress and the fear of missing important diagnoses.  
56  
57

58 *“...I referred a bowel perforation with peritonitis in a timely way to ER, but another man died on a*  
59 *bench, both after a telephone consultation...”(GP17)*  
60

1  
2  
3 GPs stress that person-centered care is still the primary goal in their consultations. The focus is not  
4 only on triage of physical complaints, but they take their time to assess fear, to reassure people and  
5 to answer questions. This is a significant part of the work right now. Here too it is important to  
6 provide care for patients you know.  
7

8  
9 *"...most of the time the consultations are about a physical symptom...but when you ask a bit more*  
10 *you hear that they are actually very worried..." (GP1)*  
11

12 *"Respiratory problems are common these days, often people have difficulties breathing because of*  
13 *fear or tension. The physiotherapists in our practice made a video to teach patients how to gain*  
14 *control over their breathing again..." (GP9)*  
15

16  
17 Communication is affected in physical consultations as well, because of protective measures which  
18 are taken.  
19

20  
21 *"We use the FFP2 masks and a special suit, this makes the consultations less smooth and longer.*  
22 *Patients sometimes do not understand me and it is more difficult to show empathy with these*  
23 *masks..."(GP12)*  
24

### 25 26 27 28 29 30 **Theme 3 Problem solving skills**

31  
32 Clinical decision-making is different, and more difficult because less information can be obtained in  
33 telephone consultations. Mostly it is limited to questioning patients about their own examinations,  
34 for instance their temperature or pulse rate. Furthermore, the changed epidemiology affects how  
35 symptoms are interpreted. Because there is a large focus on COVID-19, GPs think they will miss other  
36 diagnoses more frequently.  
37

38  
39 *"...I think serious conditions will be missed because we hardly examine people...for example, a*  
40 *bacterial pneumonia, which is normally treated with antibiotics...this will be labelled as a covid-case...*  
41 *or atrial fibrillation, which will not be detected on the phone..."(GP7)*  
42

43  
44 Chronic problems are dealt with less effectively. Priority for COVID-19 pathology is one reason, and  
45 the fact that patients present less often for their follow-up is another. Patients with multimorbidity  
46 are at risk of COVID-19 complications, and a physical consultation is to risk being infected.  
47 Consultations and home visits are reduced to a minimum, although GPs have difficulty in deciding  
48 which patient contacts can be postponed safely. Recurrent drug prescriptions can be sent straight to  
49 the pharmacist.  
50

51  
52 *"Patients seem to attend less for these (chronic) problems; they fear taking time from us in these busy*  
53 *days, or they are afraid of getting infected..." (GP17)*  
54

55  
56 *"...they postpone follow-up consultations for diabetes, because that's not really urgent...but I feel it is*  
57 *difficult to draw the line..."(GP37)*  
58  
59  
60

1  
2  
3 Many GPs express their worry about this. It will result in a huge workload after the acute phase of  
4 this epidemic, and health problems due to suboptimal follow-up are expected. They want to keep  
5 providing chronic care. Several GPs proactively telephone their chronic patients if they are unable to  
6 do home visits or see them in their office.  
7

8  
9 A similar phenomenon is observed for acute problems. People need to phone first, and many  
10 problems are dealt with by telephone. Patients seem to call less frequently for regular care. The  
11 number of regular consultations is decreased by 70-80%. Furthermore, some diagnostics, such as  
12 non-urgent radiology, are not available now.  
13

14  
15 *"...I fear that I will see a lot of collateral damage after this crisis. We hardly see people with heart  
16 attacks. Where are they? .... Maybe they are afraid to consult us and then contract the virus. Or we  
17 have people on the phone with complaints, who don't want us to visit them, even if we think it is  
18 necessary..." (GP8)*  
19

20  
21 *"...some problems are urgent, even in these exceptional times. Someone with a hearing aid who has a  
22 wax plug needs to be helped, this cannot wait. It is obvious that people can still come to us for that  
23 kind of care..."(GP61)*  
24

25  
26 Acute psychological care is difficult to organise. Telephone consultations are often not sufficient.  
27 Longer phone calls are planned at the end of the day. Some GPs, and some of the psychologists and  
28 psychiatrists they work with, offer video consultations.  
29

30  
31 Common, non-urgent problems have no priority these days. However, it is sometimes difficult to  
32 differentiate between urgent and non-urgent problems by telephone.  
33

#### 34 35 36 **Theme 4 Comprehensive care**

37  
38 The media are a dominant source for health advice and promotion concerning COVID-19. GPs feel  
39 they also have an important role in providing and repeating advice. Information by the local or  
40 nationwide authorities is often used – GPs post this information on their website or send leaflets by  
41 email. GPs said patients will follow their advice more easily than advice in the media, and they can  
42 refine or nuance messages.  
43

44  
45 *"...there is clearly an oversupply of information, and some of it is incorrect...a big part of our job is to  
46 remove wrong ideas and to reassure people..."(GP44)*  
47

48  
49 *"...next to the door handle I put a big arrow with the words "corona virus for free". We hammer home  
50 the message, sometimes with a bit of humour..."(GP110)*  
51

52  
53 *"...when people are worried about the number of covid deaths, I try to put this in perspective. Using  
54 the website Worldometer I show them how many people die of smoking cigarettes, for example..."  
55 (GP50)*  
56

57  
58 Sources of information for health care providers are Sciensano (a public research institution  
59 dedicated to science and health), Domus Medica (the Flemish organisation of GPs), but also informal  
60 chat groups on social media.

1  
2  
3 *"There is a dedicated Facebook group for medical doctors in which 15,000 doctors participate. This is*  
4 *a good source for information"(GP121)*  
5

6 Some parts of comprehensive care get less attention or are not a priority. Care for the elderly who  
7 live in nursing homes is no longer provided by GPs. A coordinating physician in the nursing home  
8 takes up this task now. Restrictions exist for people in service flats. Prevention not linked to COVID-  
9 19 is not a priority for most of the interviewees. Screening activities are suspended. Vaccinations in  
10 newborns and infants are still carried out.  
11  
12  
13

### 14 15 16 17 **Theme 5: Community orientation**

18  
19 In Belgium, employees who must stay at home on sick leave always need a certificate from a  
20 physician. This is often provided by the GP after consultation or home visit. During the COVID-19  
21 crisis, these certificates are to be provided without physical examination of the patient, which is  
22 highly unusual.  
23

24  
25 Especially for this kind of work GPs describe their frustration as feeling like an 'ink pad'. Much of their  
26 time goes to writing sick leave certificates, digital prescriptions, writing mails....  
27

28  
29 *"We have become an ink pad now. Following each phone consultation we need to write sick leave*  
30 *notes and prescriptions, and then mail or fax them. We are constantly doing administrative work,*  
31 *which frustrates me and my colleagues..." (GP33)*  
32

33 GPs respect the guidelines to advise and prescribe patients to stay at home after a phone or physical  
34 consultation when having covid-like symptoms. But more than previously, they think the system of  
35 sick leave notes should be reconsidered.  
36

37  
38 *"...I realise that there will always be people who take advantage of the system. They existed before*  
39 *the epidemic as well. That is why I prefer the system in the Netherlands. They don't work with sick*  
40 *leave notes there..." (GP24)*  
41

42  
43 *"..."Don't you want to write a certificate for the cancelling of my booked holiday?" ..." Can you write*  
44 *me a certificate that allows me to work from home?"...That is of course not our core business...(GP3)*  
45

46 Community orientation involves taking care of vulnerable and frail patients. Many GPs mention that  
47 they proactively try to anticipate certain problems in order to help people, and to coordinate actions  
48 where necessary.  
49

50  
51 *"Our practice is making a list of vulnerable people and people at risk. People at risk are for example*  
52 *elderly, but also persons who still need to go to work. We ask them whether preventive measures (at*  
53 *work) are sufficient, if needed we refer them to the occupational physician. Vulnerable people are*  
54 *those who may suffer because of the lockdown measures. People with relationship issues, difficult*  
55 *family situations, lonely people, people suffering from depression...The social worker will contact*  
56 *these people and if she thinks there is a need for supplementary counseling, she will refer them in*  
57 *order to help these people as well..." (GP11)*  
58  
59  
60

## Theme 6: Holistic view

GPs mention that a COVID-19 diagnosis is much more than a physical disease. It causes a lot of worry even in people with mild symptoms, who have an increased need for reassurance and information as compared to, for example, during an influenza epidemic.

*"...we notice that many people – even when they are physically not very ill – suffer inner struggles. In circumstances like these you see that our society is psychologically not as healthy as you might think at first sight..." (GP21)*

Most respondents are pleased with the way the government is handling the epidemic. However, many worry about the psychosocial consequences of the outbreak, and more specifically about the lockdown measures to control it. Loneliness, depression, and intrafamilial violence are seen more frequently. Problems are also detected in persons who previously had good mental health; some people are unable to cope with the new situation.

*"...for people with mental problems, like depression, it is very difficult to have to stay at home all day and to be deprived of social contacts....families at risk of child or partner violence go through difficult times now..." (GP22)*

*"...for example, one partner in a couple lives in a home for the elderly, and her husband lives in a service flat in the same home, but they are not allowed to see each other anymore...that is very hard for them..." (GP5)*

Social and economic problems are just around the corner: children in vulnerable families will develop a learning deficit because distance learning does not suit them, and temporary unemployment and loss of income or jobs will influence health and welfare in the long term. These consequences may have been underestimated.

From an ecological perspective, this outbreak is no surprise for some GPs, it is seen as a natural biological process or a consequence of overcrowding and over-exploitation of the earth. According to some, the measures that are taken have a positive effect on nature.

*"...it is a good wake-up call for everybody. Now we see clearly the effect of our behaviour on nature..." (GP47)*

On several occasions it was argued that in the management of this epidemic the remedy might be worse than the disease.

*"Corona virus is for me the least of the problem, I know what it is and how to deal with it, rather it will be the consequences that can be dramatic." (GP72)*

*"but it is now striking that the areas that did not work well are now in trouble. For example, the residential care centres where many have been saved, too few people and too few trained people are working, which makes the task even more difficult. This is also the case in the care for the disabled and in psychological care." (GP49)*



### Theme 7: Self-protection and self-care

In the early phase of the epidemic it was difficult to find personal protective equipment. Physicians got help from local pharmacists and industry. On a personal level GPs wear different combinations of mouth masks and/or gloves and/or glasses and/or protective aprons. Hand hygiene and social distancing are considered important as well. Many miss accurate information on how exactly they should protect themselves.

*“At home I put my clothes aside and take a shower after work. Most of these actions I had to find out by myself, the government has not really helped with this...”(GP7)*

*“In the end we managed to get a sufficient amount of masks for ourselves. And by now we receive better masks as well. It is still difficult to get adequate equipment, for example protective aprons are a problem. Alcohol gel is also a problem, but this has been solved with the help of local pharmacists and industry. And we managed to get disinfectant to clean the practice.” (GP9)*

Many GPs are convinced that they are at high risk of getting infected. Most GPs do not experience a psychological burden regarding themselves, but rather worry about transmitting the infection to others. Furthermore, GPs worry about not being able to function anymore and adding to their colleagues' work.

*“I wear, if necessary, a mask, glasses, etc...Anyway there is a big chance I will contract it myself, but I am not afraid of it. However, I am afraid of being an asymptomatic carrier and transmitting the virus to patients or at home...”(GP74)*

*“There is the fear that if I become infected, my colleague would have to do the work alone and all the burden will be on her shoulders. I want to avoid that...” (GP10)*

Another aspect of psychological burden for GPs is that they cannot predict what to expect in the coming period.

*“The burden of patients has actually decreased, but the tension is high. This is what makes it difficult in epidemic times. We don't know what will come, and what expectations we can/must have...”(GP9)*

### DISCUSSION

Our interviews give an insight into the quick changes that had to be made in general practice, due to the changed needs caused by the COVID-19 outbreak. Changes in practice management involved separating covid and non-covid flows, which was done both in individual practices and by means of *ad hoc* established specialised centres. Creative solutions for practice logistics were adopted. There was a major switch towards telephone triage and consultations, for covid- as well as for non-covid related problems. GPs stated that telephone consultations make communication difficult because of the loss of non-verbal language and because patients are not always able to express themselves sufficiently in a telephone call. However, the importance of patient-centered care is still felt, and they spend a considerable amount of time assessing fear, worry, and questions, apart from the physical assessment. A pre-existing doctor-patient relationship is helpful in ensuring this aspect of general practice care. Clinical decision-making is largely focused on respiratory assessment and



1  
2  
3 triage, and they feel that acute care is compromised, both by their own changed focus and by the  
4 fact that patients consult less frequently for non-covid problems. Chronic care is mostly postponed,  
5 and GPs fear that this may have consequences that will extend and become visible after the corona  
6 crisis. Comprehensive care includes prevention and health education, which are mainly focused on  
7 infectious diseases in this period, and in collaboration with local and global health authorities.  
8 Primary care practice is in this crisis very much community oriented, contributing to limiting the  
9 spread of the infection; on the other hand, the administrative burden relating to sick leave is often  
10 criticized in these interviews. Through the holistic eyes of primary care, some doctors feel that if we  
11 succeed in flattening the infectious curve and preserving hospital facilities, society has done a  
12 tremendous job. However, the current outbreak, as well as the measures taken to control it, will  
13 have a profound impact on psychological and socio-economic wellbeing. This impact is already visible  
14 in vulnerable people and will continue to become clear in the medium and long term. Possibly the  
15 side-effects of the cure will be worse than the disease.  
16 GPs protect themselves although, at least at the time the interviews were taken, PPE are scarce. They  
17 are inventive in trying to protect themselves but because of their frequent and close professional  
18 contact with potential carriers, many think they are at high risk of becoming infected. Dropping out  
19 and being unable to contribute their part or becoming virus transmitters are reported to be greater  
20 concerns than becoming ill themselves.

### 27 **Strengths and limitations**

29 A major strength of this study is the large number of interviews that was obtained in a very short  
30 period. While GPs who experienced a sudden rise in workload might not have been willing to spend  
31 some of their time on research, their solidarity with medical students, who needed to get their credit  
32 while all their classes were suspended, turned out to be a strong motivator.  
33 Furthermore, we obtained a mix of interviewees, some of whom had a tradition of working with  
34 students as internship supervisors, and others who had no link at all with educational or academic  
35 settings. We believe that this blend explains the richness of data that was collected.  
36 Our study has some limitations because of the decisions we took on data collection and design. The  
37 interviewers were medical students who had no experience in interviewing. Possibly the GPs will  
38 have formulated their responses for this specific "audience" of medical students. Furthermore, the  
39 written interview reports may reflect interpretations of the GPs' words by our students. However we  
40 organised member checking by giving GPs the opportunity to read and correct their statements in  
41 their interviews, which increased trustworthiness of the findings. The fact that all interviews were  
42 taken simultaneously (in the same week) implies that we were not able to adapt the interview  
43 schedule in the light of emerging data.  
44  
45  
46  
47  
48  
49  
50

### 51 **Comparison with literature findings**

53 Primary care literature on the impact of the COVID-19 outbreak on primary care is still emerging; at  
54 present it mainly consists of practice guidelines, for example on telephone or video consulting(15-  
55 16). Reports on psychological(17) and socioeconomic repercussions(18) of lockdown measures  
56 present similar results and warnings to the ones our GPs expressed. Several reports(19,20) describe  
57 the profound effect of the outbreak on the psychological well-being of health care professionals, in  
58 accordance with effects seen in previous outbreaks. This is not a factor that emerged clearly from our  
59  
60

1  
2  
3 interviews, possibly because they were taken at the beginning of the epidemic, but it shows that we  
4 should be prepared to offer support services for medical care providers in the near future.  
5 Some of the barriers and challenges that were reported by the GPs in our study, were similar to  
6 those earlier reported in evaluations of primary care response to previous health crises such as 'flu  
7 outbreaks: lack of PPE, training and information access, support from authorities, emotional  
8 burden(6,7). What seems to be new for this outbreak is the concern about collateral damage of the  
9 lockdown measures – indeed these measures were much more drastic and prolonged than, for  
10 example, in previous 'flu outbreaks.  
11  
12  
13  
14  
15

### 16 **Implications for practice**

17  
18 These data, as well as giving an insight into the way general practice has organised itself as a reaction  
19 to the COVID19 epidemic, reveal some sore points which will need to be addressed in this epidemic  
20 as well as in future infectious outbreaks. Medium- and long-term consequences of the fact that  
21 regular, non-COVID care is impaired while the focus of general practice at this stage is largely on  
22 triage and on managing respiratory pathology, are anticipated. Psychological and socio economic  
23 consequences are to be expected.  
24

25  
26 The perceived deficient self-protection for GPs is a consequence, not only of the lack of availability of  
27 PPE, but also of the specific general practice context. Although a well-protected environment is  
28 created in the physical triage centres, GPs continue to have close contacts with people with mild or  
29 no respiratory symptoms, who may be infected and contagious.  
30

31 Administrative procedures, especially providing sick leave notes in the context of telephone  
32 consulting, was perceived as a burden and caused frustration. Alternative solutions should be  
33 considered for the future. Next to medical practice implications, this outbreak has implications for  
34 medical education. Teaching and role modelling within a clinical environment have been suspended  
35 for a yet uncertain period of time. Involving students in telehealth, creating virtual cases and  
36 deferring clinical rotations are possible solutions(21); thorough evaluation of these will show  
37 whether in these circumstances students are able to develop their necessary skills. We seized the  
38 opportunity to involve students, who could not do their internships, in this study, and to show them  
39 the changing primary care landscape through researchers' eyes. This has led to interesting self-  
40 reflections which will be collected in the context of another project. Lastly, scientific research is an  
41 indispensable source of information to tailor an effective response to health crises. However, the  
42 window of opportunity for data collection is narrow. Our own suboptimal research decisions reflect  
43 this lack of time. Preparedness plans for research as well as for clinical practice can support effective  
44 research in the future and should address political, ethical, administrative, contractual, regulatory,  
45 logistic, economic and societal factors that influence research during an outbreak(22).  
46  
47  
48  
49  
50

### 51 **Conclusion**

52  
53 General practitioners stand at the frontline in this coronavirus epidemic. Our study shows that the  
54 current times have a profound impact on the core competencies of GPs. They demonstrate a great  
55 flexibility and resilience when confronted with the challenges in the early phase of the epidemic.  
56 Although the vast increase in patients soliciting medical help and the necessary separate covid- and  
57 non-covid flows have been dealt with promptly, GPs are worried about the continuity of regular care  
58 and the consequences of the anti-covid measures. These may become a threat for the general health  
59  
60

1  
2  
3 in the population and for the provision of primary health care in the near and distant future.  
4 What does not kill you, makes you stronger, Nietzsche said more than a hundred years ago(23).  
5 According to our data COVID-19 has not been able to deprive primary care of its core characteristics;  
6 however whether it will come out of this crisis stronger, remains to be seen.  
7  
8  
9  
10  
11  
12

13 **Author statement:** all authors (VV, GT, HP, PVR) have been involved in the design, analysis and  
14 writing of this paper. During the formal analysis, the first author took the lead with the support of  
15 both co-authors. The first author made the first draft of the paper after which the co-authors revised  
16 the entire. The first author is the guarantor. The corresponding author attests that all listed authors  
17 meet authorship criteria and that no others meeting the criteria have been omitted.  
18  
19

20 **Data sharing:** data are available upon reasonable request.  
21

22 **Funding:** no funding.  
23

24 **Competing interests declaration:** All authors declare they have no competing interests.  
25

26 **Acknowledgements:** We thank all 132 GPs who took the time to give an interview during busy times.  
27 Furthermore, we thank the Irish author Ann Lane for editing our manuscript.  
28  
29  
30  
31  
32  
33  
34  
35  
36  
37  
38  
39  
40  
41  
42

## 43 REFERENCES

44  
45 1 Tanne JH, Hayasaki E, Zastrow M, Pulla P, et al. Covid-19: how doctors and healthcare systems are  
46 tackling coronavirus worldwide. *BMJ* 2020;368:m1090  
47

48 2 van Olmen J, Remmen R, Van Royen P, et al. Regional coordination and bottom-up response of  
49 general practitioners in Belgium and the Netherlands. *BMJ* 2020;369:m1377. doi:  
50 10.1136/bmj.m1377  
51

52  
53 3 Morreel S, Philips H, Verhoeven V. Organisation and characteristics of out-of-hours primary care  
54 during a COVID-19 outbreak. In press.  
55

56 4 Allen J, Gay B, Crebolder H, et al . The European definitions of the key features of the discipline of  
57 general practice: the role of the GP and core competencies. *Br J Gen Pract.* 2002;52:526-7  
58  
59  
60

- 1  
2  
3 5 Wonca-Europe definition of Family Medicine. 3rd edition 2011. <http://www.woncaeurope.org/>  
4 (accessed 18th April 2020)  
5
- 6  
7 6. Kunin M, Engelhard D, Piterman L, Thomas S. Response of General Practitioners to Infectious  
8 Disease Public Health Crises: An Integrative Systematic Review of the Literature. *Disaster Med Public*  
9 *Health Prep.* 2013;7:522-33  
10
- 11  
12 7. Taro Tomizuka, Yasuhiro Kanatani, Kazuo Kawahara. Insufficient Preparedness of Primary Care  
13 Practices for Pandemic Influenza and the Effect of a Preparedness Plan in Japan: A Prefecture-Wide  
14 Cross-Sectional Study. *BMC Fam Pract.* 2013;14:174  
15
- 16  
17 8. Kunin M, Engelhard D, Thomas S, Ashworth M, Piterman L. Influenza pandemic 2009/A/H1N1  
18 management policies in primary care: a comparative analysis of three countries. *Aust Health Rev.*  
19 2013;37:291-9  
20
- 21  
22 9. Holmberg M, Lundgren B. Framing Post-Pandemic Preparedness: Comparing Eight European Plans.  
23 *Glob Public Health* 2018;13:99-114  
24
- 25  
26 10. Hummers Pradier E, Beyer M, Chevallier P, et al. The research agenda for general practice/family  
27 medicine and primary health care in Europe. Part 1. Background and methodology. *Eur J Gen Pract.*  
28 2009;15:243-50.  
29
- 30  
31 11 Gale NK, Heath G, Cameron E, Rashid S, Redwood S. Using the framework method for the analysis  
32 of qualitative data in multi-disciplinary health research. *BMC Med Res Methodol.* 2013;13:117  
33
- 34  
35 12 Ritchie J, Spencer L. Qualitative data analysis for applied policy research. In: Bryman A, Burgess R,  
36 editors. *Analysing qualitative data.* London: Routledge; 1993:173–194.  
37
- 38  
39 13. Korstjens I, Moser A. Series: Practical guidance to qualitative research. Part 4: trustworthiness and  
40 publishing. *Eur J Gen Pract.* 2018;24:1–5. doi: 10.1080/13814788.2017.1375092.  
41
- 42  
43 14. O'Brien BC, Harris IB, Beckman TJ, Reed DA, Cook DA. Standards for reporting qualitative  
44 research: a synthesis of recommendations. *Acad Med.* 2014;89:1245-1251.  
45
- 46  
47 15. Greenhalgh T, Koh GCH, Car J Covid-19: a remote assessment in primary care. *BMJ* 2020; 368 doi:  
48 <https://doi.org/10.1136/bmj.m1182>  
49
- 50  
51 16. Greenhalgh T, Wherton J, Shaw S, Morrison C. Video consultations for covid-19. *BMJ*  
52 2020;368:m998 doi: 10.1136/bmj.m998  
53
- 54  
55 17. Losada-Baltar A, Jiménez-Gonzalo L, Gallego-Alberto L, et al. "We're staying at home". Association  
56 of self-perceptions of aging, personal and family resources and loneliness with psychological distress  
57 during the lock-down period of COVID-19. *J Gerontol B Psychol Sci Soc Sci.* 2020 pii: gbaa048. doi:  
58 10.1093/geronb/gbaa048  
59
- 60  
61 18. Chung RY, Dong D, Li MM. Socioeconomic gradient in health and the covid-19 outbreak. *BMJ*  
2020; 369 doi: <https://doi.org/10.1136/bmj.m1329>

- 1  
2  
3 19. Lu W, Wang H, Lin Y, Li L. Psychological status of medical workforce during the COVID-19  
4 pandemic: A cross-sectional study. *Psychiatry Res.* 2020;288:112936. doi:  
5 10.1016/j.psychres.2020.112936  
6  
7  
8 20. Kang L, Ma S, Chen M, et al. Impact on mental health and perceptions of psychological care  
9 among medical and nursing staff in Wuhan during the 2019 novel coronavirus disease outbreak: A  
10 cross-sectional study. *Brain Behav Immun.* 2020 pii: S0889-1591(20)30348-2. doi:  
11 10.1016/j.bbi.2020.03.028  
12  
13  
14 21. Rose S. Medical Student Education in the Time of COVID-19 *JAMA*. Published online March 31,  
15 2020. doi:10.1001/jama.2020.5227  
16  
17 22. Gobat N, Amuasi J, Yazdanpanah Y, Sigfrid L, et al. Advancing Preparedness for Clinical  
18 Research During Infectious Disease Epidemics. *ERJ Open Res.* 2019; 5: 00227-2018  
19  
20  
21 23. Nietzsche F. *Twilight of the Idols: or How to Philosophise with a Hammer* (Oxford World's  
22 Classics). Publisher: Oxford University Press, 1998. ISBN 10: 0192831380  
23  
24  
25  
26  
27  
28  
29  
30  
31  
32  
33  
34  
35  
36  
37  
38  
39  
40  
41  
42  
43  
44  
45  
46  
47  
48  
49  
50  
51  
52  
53  
54  
55  
56  
57  
58  
59  
60

## Supplementary file: Interview guide

1. How was **practice management** modified in the context of COVID-19; how is the collaboration with colleagues/the hospital organized? What is the change in workload? To what extent are telephone consults adopted and what is their impact on practice management?
2. How is **person-centred care** affected? Can this aspect of care be preserved in telephone consultations? Is attention paid/time available to address worries, fear of patients or is the estimation of physical illness primordial?
3. How is decision making influenced in consults for **acute, non-COVID or chronic problems**?
4. How does a **comprehensive approach** involve COVID-specific risk management and health education?
5. Concerning **community orientation**, how is dealt with the contagious aspect and with the need for illness certificates for school and work?
6. Which broader, **holistic view** does the GP have on the outbreak and management of an epidemic such as COVID19?
7. How does the GP **protect himself** against infection during his work with infected or possibly infected patients?

# Reporting checklist for qualitative study.

Based on the SRQR guidelines.

## Instructions to authors

Complete this checklist by entering the page numbers from your manuscript where readers will find each of the items listed below.

Your article may not currently address all the items on the checklist. Please modify your text to include the missing information. If you are certain that an item does not apply, please write "n/a" and provide a short explanation.

Upload your completed checklist as an extra file when you submit to a journal.

In your methods section, say that you used the SRQR reporting guidelines, and cite them as:

O'Brien BC, Harris IB, Beckman TJ, Reed DA, Cook DA. Standards for reporting qualitative research: a synthesis of recommendations. Acad Med. 2014;89(9):1245-1251.

|              | Reporting Item                                                                                                                                                                                                                                          | Page Number |
|--------------|---------------------------------------------------------------------------------------------------------------------------------------------------------------------------------------------------------------------------------------------------------|-------------|
| <b>Title</b> |                                                                                                                                                                                                                                                         |             |
|              | <a href="#">#1</a> Concise description of the nature and topic of the study identifying the study as qualitative or indicating the approach (e.g. ethnography, grounded theory) or data collection methods (e.g. interview, focus group) is recommended | 1           |

**Abstract**

2

[#2](#) Summary of the key elements of the study using the abstract format of the intended publication; typically includes background, purpose, methods, results and conclusions

**Introduction**

3

## Problem formulation

[#3](#) Description and significance of the problem / phenomenon studied: review of relevant theory and empirical work; problem statement

## Purpose or research question

[#4](#) Purpose of the study and specific objectives or questions

3

**Methods**

## Qualitative approach and research paradigm

[#5](#) Qualitative approach (e.g. ethnography, grounded theory, case study, phenomenology, narrative research) and guiding theory if appropriate; identifying the research paradigm (e.g. postpositivist, constructivist / interpretivist) is also recommended; rationale. The rationale should briefly discuss the justification for choosing that theory, approach, method or technique rather than other options available; the assumptions and limitations implicit in those choices and how those choices influence study conclusions and transferability.

4



As appropriate the rationale for several items might be discussed together.

|    |                           |                     |   |
|----|---------------------------|---------------------|---|
| 1  |                           |                     |   |
| 2  |                           |                     |   |
| 3  |                           |                     |   |
| 4  |                           |                     |   |
| 5  |                           |                     |   |
| 6  | Researcher                | <a href="#">#6</a>  | 4 |
| 7  |                           |                     |   |
| 8  | characteristics and       |                     |   |
| 9  |                           |                     |   |
| 10 | reflexivity               |                     |   |
| 11 |                           |                     |   |
| 12 |                           |                     |   |
| 13 |                           |                     |   |
| 14 |                           |                     |   |
| 15 |                           |                     |   |
| 16 |                           |                     |   |
| 17 |                           |                     |   |
| 18 |                           |                     |   |
| 19 |                           |                     |   |
| 20 |                           |                     |   |
| 21 |                           |                     |   |
| 22 | Context                   | <a href="#">#7</a>  | 4 |
| 23 |                           |                     |   |
| 24 |                           |                     |   |
| 25 | Sampling strategy         | <a href="#">#8</a>  | 4 |
| 26 |                           |                     |   |
| 27 |                           |                     |   |
| 28 |                           |                     |   |
| 29 |                           |                     |   |
| 30 |                           |                     |   |
| 31 |                           |                     |   |
| 32 |                           |                     |   |
| 33 |                           |                     |   |
| 34 |                           |                     |   |
| 35 | Ethical issues pertaining | <a href="#">#9</a>  | 4 |
| 36 |                           |                     |   |
| 37 | to human subjects         |                     |   |
| 38 |                           |                     |   |
| 39 |                           |                     |   |
| 40 |                           |                     |   |
| 41 |                           |                     |   |
| 42 |                           |                     |   |
| 43 |                           |                     |   |
| 44 |                           |                     |   |
| 45 | Data collection methods   | <a href="#">#10</a> | 4 |
| 46 |                           |                     |   |
| 47 |                           |                     |   |
| 48 |                           |                     |   |
| 49 |                           |                     |   |
| 50 |                           |                     |   |
| 51 |                           |                     |   |
| 52 |                           |                     |   |
| 53 |                           |                     |   |
| 54 |                           |                     |   |
| 55 |                           |                     |   |
| 56 |                           |                     |   |
| 57 |                           |                     |   |
| 58 |                           |                     |   |
| 59 |                           |                     |   |
| 60 |                           |                     |   |

|    |                         |                     |                                                          |      |
|----|-------------------------|---------------------|----------------------------------------------------------|------|
| 1  | Data collection         | <a href="#">#11</a> | Description of instruments (e.g. interview guides,       | 4    |
| 2  |                         |                     | questionnaires) and devices (e.g. audio recorders)       |      |
| 3  | instruments and         |                     | used for data collection; if / how the instruments(s)    |      |
| 4  |                         |                     | changed over the course of the study                     |      |
| 5  | technologies            |                     |                                                          |      |
| 6  |                         |                     |                                                          |      |
| 7  |                         |                     |                                                          |      |
| 8  |                         |                     |                                                          |      |
| 9  |                         |                     |                                                          |      |
| 10 |                         |                     |                                                          |      |
| 11 | Units of study          | <a href="#">#12</a> | Number and relevant characteristics of participants,     | 4    |
| 12 |                         |                     | documents, or events included in the study; level of     |      |
| 13 |                         |                     | participation (could be reported in results)             |      |
| 14 |                         |                     |                                                          |      |
| 15 |                         |                     |                                                          |      |
| 16 |                         |                     |                                                          |      |
| 17 |                         |                     |                                                          |      |
| 18 |                         |                     |                                                          |      |
| 19 | Data processing         | <a href="#">#13</a> | Methods for processing data prior to and during          | 4    |
| 20 |                         |                     | analysis, including transcription, data entry, data      |      |
| 21 |                         |                     | management and security, verification of data integrity, |      |
| 22 |                         |                     | data coding, and anonymisation / deidentification of     |      |
| 23 |                         |                     | excerpts                                                 |      |
| 24 |                         |                     |                                                          |      |
| 25 |                         |                     |                                                          |      |
| 26 |                         |                     |                                                          |      |
| 27 |                         |                     |                                                          |      |
| 28 |                         |                     |                                                          |      |
| 29 |                         |                     |                                                          |      |
| 30 |                         |                     |                                                          |      |
| 31 | Data analysis           | <a href="#">#14</a> | Process by which inferences, themes, etc. were           | 4    |
| 32 |                         |                     | identified and developed, including the researchers      |      |
| 33 |                         |                     | involved in data analysis; usually references a specific |      |
| 34 |                         |                     | paradigm or approach; rationale                          |      |
| 35 |                         |                     |                                                          |      |
| 36 |                         |                     |                                                          |      |
| 37 |                         |                     |                                                          |      |
| 38 |                         |                     |                                                          |      |
| 39 |                         |                     |                                                          |      |
| 40 |                         |                     |                                                          |      |
| 41 | Techniques to enhance   | <a href="#">#15</a> | Techniques to enhance trustworthiness and credibility    | 4    |
| 42 |                         |                     | of data analysis (e.g. member checking, audit trail,     |      |
| 43 | trustworthiness         |                     | triangulation); rationale                                |      |
| 44 |                         |                     |                                                          |      |
| 45 |                         |                     |                                                          |      |
| 46 |                         |                     |                                                          |      |
| 47 |                         |                     |                                                          |      |
| 48 | <b>Results/findings</b> |                     |                                                          |      |
| 49 |                         |                     |                                                          |      |
| 50 |                         |                     |                                                          |      |
| 51 | Syntheses and           | <a href="#">#16</a> | Main findings (e.g. interpretations, inferences, and     | 4-11 |
| 52 |                         |                     | themes); might include development of a theory or        |      |
| 53 | interpretation          |                     | model, or integration with prior research or theory      |      |
| 54 |                         |                     |                                                          |      |
| 55 |                         |                     |                                                          |      |
| 56 |                         |                     |                                                          |      |
| 57 |                         |                     |                                                          |      |
| 58 |                         |                     |                                                          |      |
| 59 |                         |                     |                                                          |      |
| 60 |                         |                     |                                                          |      |

|    |                              |                     |                                                          |       |
|----|------------------------------|---------------------|----------------------------------------------------------|-------|
| 1  | Links to empirical data      | <a href="#">#17</a> | Evidence (e.g. quotes, field notes, text excerpts,       | 4-11  |
| 2  |                              |                     | photographs) to substantiate analytic findings           |       |
| 3  |                              |                     |                                                          |       |
| 4  |                              |                     |                                                          |       |
| 5  |                              |                     |                                                          |       |
| 6  | <b>Discussion</b>            |                     |                                                          |       |
| 7  |                              |                     |                                                          |       |
| 8  |                              |                     |                                                          |       |
| 9  |                              |                     |                                                          |       |
| 10 | Intergration with prior      | <a href="#">#18</a> | Short summary of main findings; explanation of how       | 13-14 |
| 11 | work, implications,          |                     | findings and conclusions connect to, support, elaborate  |       |
| 12 |                              |                     | on, or challenge conclusions of earlier scholarship;     |       |
| 13 | transferability and          |                     | discussion of scope of application / generalizability;   |       |
| 14 |                              |                     | identification of unique contributions(s) to scholarship |       |
| 15 | contribution(s) to the field |                     | in a discipline or field                                 |       |
| 16 |                              |                     |                                                          |       |
| 17 |                              |                     |                                                          |       |
| 18 |                              |                     |                                                          |       |
| 19 |                              |                     |                                                          |       |
| 20 |                              |                     |                                                          |       |
| 21 |                              |                     |                                                          |       |
| 22 |                              |                     |                                                          |       |
| 23 |                              |                     |                                                          |       |
| 24 | Limitations                  | <a href="#">#19</a> | Trustworthiness and limitations of findings              | 13    |
| 25 |                              |                     |                                                          |       |
| 26 |                              |                     |                                                          |       |
| 27 | <b>Other</b>                 |                     |                                                          |       |
| 28 |                              |                     |                                                          |       |
| 29 |                              |                     |                                                          |       |
| 30 | Conflicts of interest        | <a href="#">#20</a> | Potential sources of influence of perceived influence on | 15    |
| 31 |                              |                     | study conduct and conclusions; how these were            |       |
| 32 |                              |                     | managed                                                  |       |
| 33 |                              |                     |                                                          |       |
| 34 |                              |                     |                                                          |       |
| 35 |                              |                     |                                                          |       |
| 36 |                              |                     |                                                          |       |
| 37 |                              |                     |                                                          |       |
| 38 | Funding                      | <a href="#">#21</a> | Sources of funding and other support; role of funders in | 15    |
| 39 |                              |                     | data collection, interpretation and reporting            |       |
| 40 |                              |                     |                                                          |       |
| 41 |                              |                     |                                                          |       |
| 42 |                              |                     |                                                          |       |

None The SRQR checklist is distributed with permission of Wolters Kluwer © 2014 by the Association of American Medical Colleges. This checklist can be completed online using <https://www.goodreports.org/>, a tool made by the [EQUATOR Network](#) in collaboration with [Penelope.ai](#)

# BMJ Open

**Impact of the COVID-19 pandemic on the core functions of primary care: will the cure be worse than the disease?  
A qualitative interview study in Flemish GPs.**

|                                 |                                                                                                                                                                                                                                                                                                                                                                  |
|---------------------------------|------------------------------------------------------------------------------------------------------------------------------------------------------------------------------------------------------------------------------------------------------------------------------------------------------------------------------------------------------------------|
| Journal:                        | <i>BMJ Open</i>                                                                                                                                                                                                                                                                                                                                                  |
| Manuscript ID                   | bmjopen-2020-039674.R2                                                                                                                                                                                                                                                                                                                                           |
| Article Type:                   | Original research                                                                                                                                                                                                                                                                                                                                                |
| Date Submitted by the Author:   | 08-Jun-2020                                                                                                                                                                                                                                                                                                                                                      |
| Complete List of Authors:       | Verhoeven, Veronique; University of Antwerp, Primary and interdisciplinary care<br>Tsakitzidis, Giannoula; University of Antwerp, Department of Primary and Interdisciplinary Care<br>Philips, Hilde; University of Antwerp, Primary and Interdisciplinary Care<br>Van Royen, Paul; Universiteit van Antwerpen, Decanaat Geneeskunde en Gezondheidswetenschappen |
| <b>Primary Subject Heading</b>: | General practice / Family practice                                                                                                                                                                                                                                                                                                                               |
| Secondary Subject Heading:      | Health services research                                                                                                                                                                                                                                                                                                                                         |
| Keywords:                       | PRIMARY CARE, Organisation of health services < HEALTH SERVICES ADMINISTRATION & MANAGEMENT, QUALITATIVE RESEARCH                                                                                                                                                                                                                                                |
|                                 |                                                                                                                                                                                                                                                                                                                                                                  |

SCHOLARONE™  
Manuscripts



I, the Submitting Author has the right to grant and does grant on behalf of all authors of the Work (as defined in the below author licence), an exclusive licence and/or a non-exclusive licence for contributions from authors who are: i) UK Crown employees; ii) where BMJ has agreed a CC-BY licence shall apply, and/or iii) in accordance with the terms applicable for US Federal Government officers or employees acting as part of their official duties; on a worldwide, perpetual, irrevocable, royalty-free basis to BMJ Publishing Group Ltd ("BMJ") its licensees and where the relevant Journal is co-owned by BMJ to the co-owners of the Journal, to publish the Work in this journal and any other BMJ products and to exploit all rights, as set out in our [licence](#).

The Submitting Author accepts and understands that any supply made under these terms is made by BMJ to the Submitting Author unless you are acting as an employee on behalf of your employer or a postgraduate student of an affiliated institution which is paying any applicable article publishing charge ("APC") for Open Access articles. Where the Submitting Author wishes to make the Work available on an Open Access basis (and intends to pay the relevant APC), the terms of reuse of such Open Access shall be governed by a Creative Commons licence – details of these licences and which [Creative Commons](#) licence will apply to this Work are set out in our licence referred to above.

Other than as permitted in any relevant BMJ Author's Self Archiving Policies, I confirm this Work has not been accepted for publication elsewhere, is not being considered for publication elsewhere and does not duplicate material already published. I confirm all authors consent to publication of this Work and authorise the granting of this licence.

1  
2  
3 **Impact of the COVID-19 pandemic on the core functions of primary care: will**  
4 **the cure be worse than the disease?**

5  
6 **A qualitative interview study in Flemish GPs.**  
7  
8  
9

10  
11  
12  
13  
14  
15 **Authors:**  
16

17  
18 Veronique Verhoeven, Professor Department of primary and interdisciplinary care, University of  
19 Antwerp

20 Giannoula Tsakitzidis, Post-doc Researcher Department of primary and interdisciplinary care,  
21 University of Antwerp

22  
23 Hilde Philips, Professor Department of primary and interdisciplinary care, University of Antwerp

24 Paul Van Royen, Professor Department of primary and interdisciplinary care, University of Antwerp  
25

26 Corresponding author: Veronique.verhoeven@uantwerpen.be +32 (0) 3 265 25 18

27 Address for all authors: University of Antwerp, Faculty of Medicine and Health Sciences , Department  
28 of Primary and Interdisciplinary Care, Gouverneur Kinsbergen Centrum, Doornstraat 331, 2610  
29 Antwerpen, Belgium  
30  
31  
32

33  
34 Word count: 5622  
35

36 Keywords: COVID-19, SARS-CoV-2, Primary Care, General Practice, Organisation of health care  
37  
38  
39  
40  
41  
42  
43  
44  
45  
46  
47  
48  
49  
50  
51  
52  
53  
54  
55  
56  
57  
58  
59  
60

## ABSTRACT

**OBJECTIVES:** The current COVID-19 pandemic, as well as the measures taken to control it, have a profound impact on healthcare. This study was set up to gain insights into the consequences of the COVID-19 outbreak on the core competencies of general practice, as they are experienced by GPs on the frontline.

**DESIGN, SETTING, PARTICIPANTS:** We performed a descriptive study using semi-structured interviews with 132 GPs in Flanders, using a topic list based on the WONCA definition of core competencies in general practice. Data were analysed qualitatively using framework analysis.

**RESULTS:** Changes in practice management and in consultation strategies were quickly adopted. There was a major switch towards telephone triage and consults, for covid- as well as for non-covid related problems. Patient-centered care is still a major objective. Clinical decision-making is largely focused on respiratory assessment and triage, and GPs feel that acute care is compromised, both by their own changed focus and by the fact that patients consult less frequently for non-covid problems. Chronic care is mostly postponed, and this will have consequences that will extend and become visible after the corona crisis. Through the holistic eyes of primary care, the current outbreak - as well as the measures taken to control it - will have a profound impact on psychological and socio-economic wellbeing. This impact is already visible in vulnerable people and will continue to become clear in the medium and long term. GPs think that they are at high risk of getting infected. Dropping out and being unable to contribute their part or becoming virus transmitters are reported to be greater concerns than getting ill themselves.

**CONCLUSIONS:** The current times have a profound impact on the core competences of primary care. Although the vast increase in patients soliciting medical help and the necessary separate covid- and non-covid flows have been dealt with, GPs are worried about the continuity of regular care and the consequences of the anti-covid measures. These may become a threat for the general health of the population and for the provision of primary health care in the near and distant future.

### Strengths and limitations summary

strength: °large number of interviews in the hectic early phase of the outbreak

strength: °large variation in our GPs' sample, leading to rich data

strength: °first article of its kind that we are aware of

limitation: °interview reports may reflect interviewers' interpretations

limitation: °interviewers were medical students

## INTRODUCTION

The current COVID-19 pandemic puts a previously unseen stress on the organisation of healthcare. In several countries the demand for medical care exceeds the available resources, urging stakeholders to reorganise the medical landscape(1). Chronic and non-urgent care in hospitals have been largely suspended to increase the capacity of emergency and respiratory care.

On 16<sup>th</sup> March 2020, the Belgian government rolled out an emergency plan for general practice, in which telephone triage was defined as the primary means of COVID-19 triage, and in which the establishment of physical triage centres was mandated. These centres are accessible after telephone triage, and have a threefold goal: 1) to create a safe environment for general practitioners (GPs) to examine patients with suspected COVID-19 pathology; 2) to ascertain an optimal use of the scarce PPE (personal protection equipment) resources, and 3) to avoid congestion at emergency departments by diverting into these triage centres.

The emergency plan led to a quick rise of “corona centres”, largely initiated by local GPs’ teams and often organised within the structure of existing out-of-hours General Practice Cooperatives(2). The centres are manned 7/7 by a rotation of mainly GPs in the neighbourhood.

Evidently, these measures have a profound impact on primary care – an impact which extends far beyond the organisational and logistic level(3). Primary care is the first point of contact for patients with symptoms, worries, anxiety and questions concerning the epidemic. In the meantime, regular health problems do not cease to exist.

This COVID-19 outbreak is a challenge for each of the GP’s core competencies, as they are described in the European definition of General Practice, revised in 2005 and 2011 (WONCA, 2011)(4,5).

*Primary care management* requires solutions to tackle the increased number of patient contacts and to separate covid – and non-covid flows. *Person-centered care* needs to be maintained in the shift to telephone consultations. *Decision-making skills* must account for the changed epidemiology and the need for regular and covid-related care. A *comprehensive approach* includes covid-specific risk management and health education. *Community orientation* is evidently extremely important in the context of an infectious outbreak, and, finally, psychological, socio-cultural, and existential dimensions define the *holistic context* in which the GP operates.

Evaluation of health care system responses to earlier infectious pandemics shows various approaches and different levels of involvement of primary care in different countries, but generally a non-optimal preparedness(6-8). Difficulties in supply and use of personal protection equipment (PPE), healthcare decisions such as prioritisation of high-risk patients, support from authorities, lack of knowledge and training, and the emotional burden, are factors that compromise an effective response to a pandemic. In past years, various and divergent preparedness plans have been developed in different countries(9). Data from the ongoing pandemic can help in tailoring strategies for the future.

Therefore, this interview study aims to gain qualitative insights into the consequences of the COVID-19 outbreak on the core competencies of general practice, as they are experienced by GPs in the field. The interviews were taken in the early phase of the outbreak, in a time when a new routine was not yet established.



## METHODS

### Setting and participants

Semi-structured interviews were conducted by medical students in the 3<sup>rd</sup> year of their bachelor's degree, between 24 - 31 March. These students saw their planned family medicine internship cancelled because of the current pandemic; the interview served as an assignment replacing their internship. One hundred and thirty-two students conducted 132 interviews with GPs in the field in Flanders, all working as GPs in the Flemish part of Belgium, in an inner city, suburban, or rural, context. Participants were the original internship supervisors (academic and non-academic). Because some of them had time constraints or had several students in their practice, we recruited 38 GPs and 9 GP trainees *ad hoc* through social media (a private physicians' group on Facebook sharing information on COVID-19).

### Data collection and analysis

We used an interview guide (see supplementary file) which was based on the core competencies of the general practitioner in the European definition of General Practice(4). Since the six core competencies were previously used to build up a research agenda for primary care(10), this framework was a good starting point for the topic list and further thematic analysis. In addition to the six questions based on the core competencies, GPs were asked what measures they took to protect themselves against COVID-19 during their work. Each student conducted one interview by telephone or video call, on a moment beforehand agreed with the GP. Some interviews were recorded. A written report of the interview, containing a transcript or synopsis of the answers of each GP as well as demographic data of the GP, was made by the interviewer and then sent to the individual GP, who checked it for accuracy and completeness.

An inductive framework analysis approach was used to analyse data(11,12). One author independently categorised and coded initial transcripts of ten interviews and developed a draft coding framework which was then discussed and agreed by the rest of the team. The remaining interviews were then analysed by the research team using this framework, while changes and additions were made when other themes emerged. The research team was multidisciplinary and consisted of academic GPs and a physiotherapist, internship supervisors and qualitative research experts. All of them reviewed and discussed the coding on several occasions using investigators' triangulation, in order to reach consensus about the interpretation and to enhance trustworthiness of the process(13).

Data sufficiency was reached after 59 interviews, giving enough richness and depth of the data. The rest of the already performed 132 interviews were reviewed as well, they revealed sometimes a more illustrative quote but no new data.

We used the SRQR reporting guidelines as a checklist for writing this report(14).

### Ethical considerations

The ethics committee of the University of Antwerp – Antwerp University Hospital granted ethics approval for the study (ref20/15/187). Participants gave written informed consent by email for the interviews.

## Patient and public involvement

No patients involved.

## RESULTS

The characteristics of participants are shown in table 1. Fourteen of the original internship supervisors dropped out because of time constraints or illness and were replaced by another GP. A mix of internship supervisors, academics, and GPs affiliated to university was obtained. Mean duration of the interviews was 26minutes (range 15-60 min, SD = 9 min).

Table 1: Characteristics of interviewees

|                                |                               |
|--------------------------------|-------------------------------|
| Mean age (SD, range)           | 41,88 (SD 12.53; range 24-67) |
| <i>Gender</i>                  |                               |
| M                              | 51                            |
| F                              | 81                            |
| <i>Network</i>                 |                               |
| Academic                       | 11                            |
| Internship supervisor network  | 74                            |
| Recruited through social media | 38                            |
| GP trainee                     | 9                             |
| <i>Type of GP practice</i>     |                               |
| Solo                           | 15                            |
| Group                          | 111                           |
| Community Health Centre        | 4                             |
| Not known                      | 2                             |
| <i>Practice location</i>       |                               |
| Inner city                     | 43                            |
| Suburban                       | 59                            |
| Rural                          | 27                            |
| Not known                      | 3                             |

We defined seven main themes, of which the first six coincide with the primary care core competencies. A seventh theme about personal protection was added in the current context of the COVID-19 outbreak.

### Theme 1: Primary care management

Within this theme GPs explain what adjustments they have applied to cope with the governmental guidelines regarding COVID-19. They collaborate with the above described “corona centres” to separate covid- and non-covid flows. The primary contact with patients is now by telephone. Online

1  
2  
3 agendas where people can take an appointment are closed or, if possible, restructured, to  
4 discriminate between respiratory and other complaints.  
5

6 *"...all ill people with possible symptoms of the contagious coronavirus, like cough or fever, are kept*  
7 *out of our practice. This means that these days we hardly have patient visits at our practice. Patients*  
8 *with a possible infection are sent to a regional triage centre" (GP24)*  
9

10  
11 *" we only see acute patients without upper respiratory complaints, so we do not put other patients in*  
12 *danger. We do not work online anymore for appointments or open consultations" (GP4)*  
13

14 This means that they see few people per day face to face, only those with acute non-covid problems;  
15 the work is different in these circumstances. GPs start early with phone calls, adjusting their website,  
16 reading the news and relevant papers to stay informed. There is more administrative workload than  
17 usual. Some GPs perceive the workload as higher because of the phone calls and the need to stay  
18 informed, and others perceive it as lower because of the drop in physical consultations.  
19

20  
21  
22 *"...The workload is different from the usual: you need to start earlier, make a lot of phone calls, send*  
23 *emails in between, try to keep up to date by reading a lot, adjust your website...so you're busy the*  
24 *whole day...." (GP18)*  
25

26 Many GPs mention more structured working schedules within their practice. Agreements are made  
27 to divide and reallocate jobs for telephone triage, telephone consultations, face to face consultations  
28 and working in the "corona centres" .....

29  
30  
31 *"...the older doctors in our practice focus on the telephone consultations, to minimise the risk for*  
32 *them..." (GP9)*  
33

34 *"Our GPs and the trainee work at the moment in shifts of four hours. Where possible, the nurse*  
35 *participates in telephone triage. Her tasks are now mainly replaced by helping to deal with the flood*  
36 *of phone calls...." (GP31)*  
37  
38

39 Meetings with other GPs were set up to choose the procedures for self-protection and material, and  
40 to decide what to do to guarantee continuity of care.  
41

42  
43 *"...If a colleague drops out because of illness, he has to notify the coordinating GP in the region, that*  
44 *way a solution is sought to try to guarantee continuity by GPs in the neighbourhood..." (GP36)*  
45

46 The impact of the decrease in physical consultations on GPs' income is obvious, as in Belgium GPs  
47 work mainly in a fee-for-service system. Some doctors have developed a system for this to be paid  
48 per every shift worked, regardless of the tasks performed. This change is welcome because mainly  
49 making phone calls and doing administrative work is frustrating for many. Furthermore, health  
50 insurance now reimburses phone consultations within certain limits, which was not the case before  
51 COVID-19 outbreak.  
52

53  
54 *"Normally GPs work in a fee-for-service system, but now everything is pooled. All incomes are divided*  
55 *by the number of shifts a doctor works. Thus doctors are paid for each shift, including for the other*  
56 *tasks that are normally not seen as a paid service. Because the load of administrative work is*  
57 *sometimes quite frustrating, this change is more than welcome..." (GP27)*  
58  
59  
60

1  
2  
3 Measures are taken within the practices to make them more “infection-proof” to keep performing  
4 regular care, such as removing unnecessary materials in waiting or consultation rooms. The number  
5 of patients in the waiting room is limited, or patients are asked to await their turn in their car.  
6  
7

8 *“...The door of the waiting room has been removed...” (GP52)*

9  
10 *“...The practice has plexiglass now at the doctor’s desk, the patient can sit on the other side....” (GP3)*

11  
12 *‘All non-necessary materials were removed from the consultation room to prevent contamination and*  
13 *spoilage of consumables.’ (GP72)*  
14

15 Collaboration in primary care with psychologists, psychiatrists, is more intense than usual, and this is  
16 considered as very important in these circumstances.  
17

18  
19 *“It is important to stress that there is a lot of solidarity between the different health care providers. A*  
20 *psychologist contacted me because she wanted to help with the care of anxious patients, that way*  
21 *the task of reassuring people can be taken over” (GP41)*  
22

23 The corona epidemic also has an effect on the collaboration with other medical specialists. Some  
24 specialists seem to have more time to exchange information in more depth and this facilitates  
25 collaboration, but for non-urgent care the collaboration is less satisfactory.  
26  
27

28 *“Specialists have more time now, they also had to cancel all their appointments...now they are more*  
29 *helpful and approachable because they are less busy, and the collaboration with the GP is smoother*  
30 *than usual...” (GP89)*  
31

32  
33 *“All non-urgent care has been cancelled, so the patient automatically ends up with his GP again. This*  
34 *of course affects the workload.(GP30)*  
35  
36  
37  
38  
39  
40

## 41 **Theme 2: Person-Centered care**

42  
43 The switch towards telephone consultations makes the job more difficult for most GPs. The loss of  
44 non-verbal communication, the limited ability of some patients to articulate their needs, intercultural  
45 communication and associated language problems are mentioned as barriers.  
46  
47

48 *“...in the beginning I needed to get used to it, because for a GP body language is very*  
49 *important....and in our region there are lots of different cultures and languages, so you need to try to*  
50 *explain them in German or English or French, and you don’t really know if they understand....”(GP22)*  
51

52 Having their own, known patients on the phone is a huge advantage; telephone calls with patients  
53 that are not their own are much more difficult. Facilitators are using the ICE frame (ideas, concerns,  
54 expectations), and the implementation of video consultations. Still, these novel ways of working  
55 cause stress and the fear of missing important diagnoses.  
56  
57

58 *“...I referred a bowel perforation with peritonitis in a timely way to ER, but another man died on a*  
59 *bench, both after a telephone consultation...”(GP17)*  
60

1  
2  
3 GPs stress that person-centered care is still the primary goal in their consultations. The focus is not  
4 only on triage of physical complaints, but they take their time to assess fear, to reassure people and  
5 to answer questions. This is a significant part of the work right now. Here too it is important to  
6 provide care for patients you know.  
7

8  
9 *"...most of the time the consultations are about a physical symptom...but when you ask a bit more*  
10 *you hear that they are actually very worried..." (GP1)*  
11

12 *"Respiratory problems are common these days, often people have difficulties breathing because of*  
13 *fear or tension. The physiotherapists in our practice made a video to teach patients how to gain*  
14 *control over their breathing again..." (GP9)*  
15

16  
17 Communication is affected in physical consultations as well, because of protective measures which  
18 are taken.  
19

20  
21 *"We use the FFP2 masks and a special suit, this makes the consultations less smooth and longer.*  
22 *Patients sometimes do not understand me and it is more difficult to show empathy with these*  
23 *masks..."(GP12)*  
24

### 25 26 27 28 29 30 **Theme 3 Problem solving skills**

31  
32 Clinical decision-making is different, and more difficult because less information can be obtained in  
33 telephone consultations. Mostly it is limited to questioning patients about their own examinations,  
34 for instance their temperature or pulse rate. Furthermore, the changed epidemiology affects how  
35 symptoms are interpreted. Because there is a large focus on COVID-19, GPs think they will miss other  
36 diagnoses more frequently.  
37

38  
39 *"...I think serious conditions will be missed because we hardly examine people...for example, a*  
40 *bacterial pneumonia, which is normally treated with antibiotics...this will be labelled as a covid-case...*  
41 *or atrial fibrillation, which will not be detected on the phone..."(GP7)*  
42

43  
44 Chronic problems are dealt with less effectively. Priority for COVID-19 pathology is one reason, and  
45 the fact that patients present less often for their follow-up is another. Patients with multimorbidity  
46 are at risk of COVID-19 complications, and a physical consultation is to risk being infected.  
47 Consultations and home visits are reduced to a minimum, although GPs have difficulty in deciding  
48 which patient contacts can be postponed safely. Recurrent drug prescriptions can be sent straight to  
49 the pharmacist.  
50

51  
52 *"Patients seem to attend less for these (chronic) problems; they fear taking time from us in these busy*  
53 *days, or they are afraid of getting infected..." (GP17)*  
54

55  
56 *"...they postpone follow-up consultations for diabetes, because that's not really urgent...but I feel it is*  
57 *difficult to draw the line..."(GP37)*  
58  
59  
60

1  
2  
3 Many GPs express their worry about this. It will result in a huge workload after the acute phase of  
4 this epidemic, and health problems due to suboptimal follow-up are expected. They want to keep  
5 providing chronic care. Several GPs proactively telephone their chronic patients if they are unable to  
6 do home visits or see them in their office.  
7

8  
9 A similar phenomenon is observed for acute problems. People need to phone first, and many  
10 problems are dealt with by telephone. Patients seem to call less frequently for regular care. The  
11 number of regular consultations is decreased by 70-80%. Furthermore, some diagnostics, such as  
12 non-urgent radiology, are not available now.  
13

14  
15 *"...I fear that I will see a lot of collateral damage after this crisis. We hardly see people with heart  
16 attacks. Where are they? .... Maybe they are afraid to consult us and then contract the virus. Or we  
17 have people on the phone with complaints, who don't want us to visit them, even if we think it is  
18 necessary..." (GP8)*  
19

20  
21 *"...some problems are urgent, even in these exceptional times. Someone with a hearing aid who has a  
22 wax plug needs to be helped, this cannot wait. It is obvious that people can still come to us for that  
23 kind of care..."(GP61)*  
24

25  
26 Acute psychological care is difficult to organise. Telephone consultations are often not sufficient.  
27 Longer phone calls are planned at the end of the day. Some GPs, and some of the psychologists and  
28 psychiatrists they work with, offer video consultations.  
29

30  
31 Common, non-urgent problems have no priority these days. However, it is sometimes difficult to  
32 differentiate between urgent and non-urgent problems by telephone.  
33

#### 34 35 36 **Theme 4 Comprehensive care**

37  
38 The media are a dominant source for health advice and promotion concerning COVID-19. GPs feel  
39 they also have an important role in providing and repeating advice. Information by the local or  
40 nationwide authorities is often used – GPs post this information on their website or send leaflets by  
41 email. GPs said patients will follow their advice more easily than advice in the media, and they can  
42 refine or nuance messages.  
43

44  
45 *"...there is clearly an oversupply of information, and some of it is incorrect...a big part of our job is to  
46 remove wrong ideas and to reassure people..."(GP44)*  
47

48  
49 *"...next to the door handle I put a big arrow with the words "corona virus for free". We hammer home  
50 the message, sometimes with a bit of humour..."(GP110)*  
51

52  
53 *"...when people are worried about the number of covid deaths, I try to put this in perspective. Using  
54 the website Worldometer I show them how many people die of smoking cigarettes, for example..."  
55 (GP50)*  
56

57  
58 Sources of information for health care providers are Sciensano (a public research institution  
59 dedicated to science and health), Domus Medica (the Flemish organisation of GPs), but also informal  
60 chat groups on social media.

1  
2  
3 *"There is a dedicated Facebook group for medical doctors in which 15,000 doctors participate. This is*  
4 *a good source for information"(GP121)*  
5

6 Some parts of comprehensive care get less attention or are not a priority. Care for the elderly who  
7 live in nursing homes is no longer provided by GPs. A coordinating physician in the nursing home  
8 takes up this task now. Restrictions exist for people in service flats. Prevention not linked to COVID-  
9 19 is not a priority for most of the interviewees. Screening activities are suspended. Vaccinations in  
10 newborns and infants are still carried out.  
11  
12

### 13 14 15 16 17 **Theme 5: Community orientation**

18  
19 In Belgium, employees who must stay at home on sick leave always need a certificate from a  
20 physician. This is often provided by the GP after consultation or home visit. During the COVID-19  
21 crisis, these certificates are to be provided without physical examination of the patient, which is  
22 highly unusual.  
23

24  
25 Especially for this kind of work GPs describe their frustration as feeling like an 'ink pad'. Much of their  
26 time goes to writing sick leave certificates, digital prescriptions, writing mails....  
27

28  
29 *"We have become an ink pad now. Following each phone consultation we need to write sick leave*  
30 *notes and prescriptions, and then mail or fax them. We are constantly doing administrative work,*  
31 *which frustrates me and my colleagues..." (GP33)*  
32

33 GPs respect the guidelines to advise and prescribe patients to stay at home after a phone or physical  
34 consultation when having covid-like symptoms. But more than previously, they think the system of  
35 sick leave notes should be reconsidered.  
36

37  
38 *"...I realise that there will always be people who take advantage of the system. They existed before*  
39 *the epidemic as well. That is why I prefer the system in the Netherlands. They don't work with sick*  
40 *leave notes there..." (GP24)*  
41

42  
43 *"..."Don't you want to write a certificate for the cancelling of my booked holiday?" ..." Can you write*  
44 *me a certificate that allows me to work from home?"...That is of course not our core business...(GP3)*  
45

46 Community orientation involves taking care of vulnerable and frail patients. Many GPs mention that  
47 they proactively try to anticipate certain problems in order to help people, and to coordinate actions  
48 where necessary.  
49

50  
51 *"Our practice is making a list of vulnerable people and people at risk. People at risk are for example*  
52 *elderly, but also persons who still need to go to work. We ask them whether preventive measures (at*  
53 *work) are sufficient, if needed we refer them to the occupational physician. Vulnerable people are*  
54 *those who may suffer because of the lockdown measures. People with relationship issues, difficult*  
55 *family situations, lonely people, people suffering from depression...The social worker will contact*  
56 *these people and if she thinks there is a need for supplementary counseling, she will refer them in*  
57 *order to help these people as well..." (GP11)*  
58  
59  
60



## Theme 6: Holistic view

GPs mention that a COVID-19 diagnosis is much more than a physical disease. It causes a lot of worry even in people with mild symptoms, who have an increased need for reassurance and information as compared to, for example, during an influenza epidemic.

*"...we notice that many people – even when they are physically not very ill – suffer inner struggles. In circumstances like these you see that our society is psychologically not as healthy as you might think at first sight..." (GP21)*

Most respondents are pleased with the way the government is handling the epidemic. However, many worry about the psychosocial consequences of the outbreak, and more specifically about the lockdown measures to control it. Loneliness, depression, and intrafamilial violence are seen more frequently. Problems are also detected in persons who previously had good mental health; some people are unable to cope with the new situation.

*"...for people with mental problems, like depression, it is very difficult to have to stay at home all day and to be deprived of social contacts....families at risk of child or partner violence go through difficult times now..." (GP22)*

*"...for example, one partner in a couple lives in a home for the elderly, and her husband lives in a service flat in the same home, but they are not allowed to see each other anymore...that is very hard for them..." (GP5)*

Social and economic problems are just around the corner: children in vulnerable families will develop a learning deficit because distance learning does not suit them, and temporary unemployment and loss of income or jobs will influence health and welfare in the long term. These consequences may have been underestimated.

From an ecological perspective, this outbreak is no surprise for some GPs, it is seen as a natural biological process or a consequence of overcrowding and over-exploitation of the earth. According to some, the measures that are taken have a positive effect on nature.

*"...it is a good wake-up call for everybody. Now we see clearly the effect of our behaviour on nature..." (GP47)*

On several occasions it was argued that in the management of this epidemic the remedy might be worse than the disease.

*"Corona virus is for me the least of the problem, I know what it is and how to deal with it, rather it will be the consequences that can be dramatic." (GP72)*

*"but it is now striking that the areas that did not work well are now in trouble. For example, the residential care centres where many have been saved, too few people and too few trained people are working, which makes the task even more difficult. This is also the case in the care for the disabled and in psychological care." (GP49)*



### Theme 7: Self-protection and self-care

In the early phase of the epidemic it was difficult to find personal protective equipment. Physicians got help from local pharmacists and industry. On a personal level GPs wear different combinations of mouth masks and/or gloves and/or glasses and/or protective aprons. Hand hygiene and social distancing are considered important as well. Many miss accurate information on how exactly they should protect themselves.

*“At home I put my clothes aside and take a shower after work. Most of these actions I had to find out by myself, the government has not really helped with this...”(GP7)*

*“In the end we managed to get a sufficient amount of masks for ourselves. And by now we receive better masks as well. It is still difficult to get adequate equipment, for example protective aprons are a problem. Alcohol gel is also a problem, but this has been solved with the help of local pharmacists and industry. And we managed to get disinfectant to clean the practice.” (GP9)*

Many GPs are convinced that they are at high risk of getting infected. Most GPs do not experience a psychological burden regarding themselves, but rather worry about transmitting the infection to others. Furthermore, GPs worry about not being able to function anymore and adding to their colleagues' work.

*“I wear, if necessary, a mask, glasses, etc...Anyway there is a big chance I will contract it myself, but I am not afraid of it. However, I am afraid of being an asymptomatic carrier and transmitting the virus to patients or at home...”(GP74)*

*“There is the fear that if I become infected, my colleague would have to do the work alone and all the burden will be on her shoulders. I want to avoid that...” (GP10)*

Another aspect of psychological burden for GPs is that they cannot predict what to expect in the coming period.

*“The burden of patients has actually decreased, but the tension is high. This is what makes it difficult in epidemic times. We don't know what will come, and what expectations we can/must have...”(GP9)*

### DISCUSSION

Our interviews give an insight into the quick changes that had to be made in general practice, due to the changed needs caused by the COVID-19 outbreak. Changes in practice management involved separating covid and non-covid flows, which was done both in individual practices and by means of *ad hoc* established specialised centres. Creative solutions for practice logistics were adopted. There was a major switch towards telephone triage and consultations, for covid- as well as for non-covid related problems.

GPs stated that telephone consultations make communication difficult because of the loss of non-verbal language and because patients are not always able to express themselves sufficiently in a telephone call. However, the importance of patient-centered care is still felt, and they spend a considerable amount of time assessing fear, worry, and questions, apart from the physical assessment. A pre-existing doctor-patient relationship is helpful in ensuring this aspect of general

1  
2  
3 practice care.

4 Clinical decision-making is largely focused on respiratory assessment and triage, and they feel that  
5 acute care is compromised, both by their own changed focus and by the fact that patients consult  
6 less frequently for non-covid problems. Chronic care is mostly postponed, and GPs fear that this may  
7 have consequences that will extend and become visible after the corona crisis.

8  
9 Comprehensive care includes prevention and health education, which are mainly focused on  
10 infectious diseases in this period, and in collaboration with local and global health authorities.

11 Primary care practice is in this crisis very much community oriented, contributing to limiting the  
12 spread of the infection; on the other hand, the administrative burden relating to sick leave is often  
13 criticized in these interviews.

14  
15 Through the holistic eyes of primary care, some doctors feel that if we succeed in flattening the  
16 infectious curve and preserving hospital facilities, society has done a tremendous job. However, the  
17 current outbreak, as well as the measures taken to control it, will have a profound impact on  
18 psychological and socio-economic wellbeing. This impact is already visible in vulnerable people and  
19 will continue to become clear in the medium and long term. Possibly the side-effects of the cure will  
20 be worse than the disease.

21  
22 GPs protect themselves although, at least at the time the interviews were taken, PPE are scarce. They  
23 are inventive in trying to protect themselves but because of their frequent and close professional  
24 contact with potential carriers, many think they are at high risk of becoming infected. Dropping out  
25 and being unable to contribute their part or becoming virus transmitters are reported to be greater  
26 concerns than becoming ill themselves.

### 27 28 29 30 31 **Strengths and limitations**

32  
33 A major strength of this study is the large number of interviews that was obtained in a very short  
34 period. While GPs who experienced a sudden rise in workload might not have been willing to spend  
35 some of their time on research, their solidarity with medical students, who needed to get their credit  
36 while all their classes were suspended, turned out to be a strong motivator.

37  
38 Furthermore, we obtained a mix of interviewees, some of whom had a tradition of working with  
39 students as internship supervisors, and others who had no link at all with educational or academic  
40 settings. We believe that this blend explains the richness of data that was collected.

41  
42 Our study has some limitations because of the decisions we took on data collection and design. The  
43 interviewers were medical students who had no experience in interviewing. Possibly the GPs will  
44 have formulated their responses for this specific "audience" of medical students. Furthermore, the  
45 written interview reports may reflect interpretations of the GPs' words by our students. However we  
46 organised member checking by giving GPs the opportunity to read and correct their statements in  
47 their interviews, which increased trustworthiness of the findings. The fact that all interviews were  
48 taken simultaneously (in the same week) implies that we were not able to adapt the interview  
49 schedule in the light of emerging data.

### 50 51 52 53 **Comparison with literature findings**

54  
55 Primary care literature on the impact of the COVID-19 outbreak on primary care is still emerging; at  
56 present it mainly consists of practice guidelines, for example on telephone or video consulting(15-  
57 16). Reports on psychological(17) and socioeconomic repercussions(18) of lockdown measures  
58 present similar results and warnings to the ones our GPs expressed. Several reports(19,20) describe  
59  
60

1  
2  
3 the profound effect of the outbreak on the psychological well-being of health care professionals, in  
4 accordance with effects seen in previous outbreaks. This is not a factor that emerged clearly from our  
5 interviews, possibly because they were taken at the beginning of the epidemic, but it shows that we  
6 should be prepared to offer support services for medical care providers in the near future.  
7 Some of the barriers and challenges that were reported by the GPs in our study, were similar to  
8 those earlier reported in evaluations of primary care response to previous health crises such as 'flu  
9 outbreaks: lack of PPE, training and information access, support from authorities, emotional  
10 burden(6,7). What seems to be new for this outbreak is the concern about collateral damage of the  
11 lockdown measures – indeed these measures were much more drastic and prolonged than, for  
12 example, in previous 'flu outbreaks.  
13  
14  
15  
16  
17  
18

### 19 **Implications for practice**

20  
21 These data, as well as giving an insight into the way general practice has organised itself as a reaction  
22 to the COVID19 epidemic, reveal some sore points which will need to be addressed in this epidemic  
23 as well as in future infectious outbreaks. Medium- and long-term consequences of the fact that  
24 regular, non-COVID care is impaired while the focus of general practice at this stage is largely on  
25 triage and on managing respiratory pathology, are anticipated. Psychological and socio economic  
26 consequences are to be expected.  
27

28  
29 The perceived deficient self-protection for GPs is a consequence, not only of the lack of availability of  
30 PPE, but also of the specific general practice context. Although a well-protected environment is  
31 created in the physical triage centres, GPs continue to have close contacts with people with mild or  
32 no respiratory symptoms, who may be infected and contagious.  
33

34 Administrative procedures, especially providing sick leave notes in the context of telephone  
35 consulting, was perceived as a burden and caused frustration. Alternative solutions should be  
36 considered for the future.  
37

38 Next to medical practice implications, this outbreak has implications for medical education. Teaching  
39 and role modelling within a clinical environment have been suspended for a yet uncertain period of  
40 time. Involving students in telehealth, creating virtual cases and deferring clinical rotations are  
41 possible solutions(21); thorough evaluation of these will show whether in these circumstances  
42 students are able to develop their necessary skills. We seized the opportunity to involve students,  
43 who could not do their internships, in this study, and to show them the changing primary care  
44 landscape through researchers' eyes. This has led to interesting self-reflections which will be  
45 collected in the context of another project.  
46  
47

48 Lastly, scientific research is an indispensable source of information to tailor an effective response to  
49 health crises. However, the window of opportunity for data collection is narrow. Our own suboptimal  
50 research decisions reflect this lack of time. Preparedness plans for research as well as for clinical  
51 practice can support effective research in the future and should address political, ethical,  
52 administrative, contractual, regulatory, logistic, economic and societal factors that influence research  
53 during an outbreak(22).  
54  
55

### 56 **Conclusion**

57  
58 General practitioners stand at the frontline in this coronavirus epidemic. Our study shows that the  
59 current times have a profound impact on the core competencies of GPs. They demonstrate a great  
60

1  
2  
3 flexibility and resilience when confronted with the challenges in the early phase of the epidemic.  
4 Although the vast increase in patients soliciting medical help and the necessary separate covid- and  
5 non-covid flows have been dealt with promptly, GPs are worried about the continuity of regular care  
6 and the consequences of the anti-covid measures. These may become a threat for the general health  
7 in the population and for the provision of primary health care in the near and distant future.  
8 What does not kill you, makes you stronger, Nietzsche said more than a hundred years ago(23).  
9 According to our data COVID-19 has not been able to deprive primary care of its core characteristics;  
10 however whether it will come out of this crisis stronger, remains to be seen.  
11  
12  
13  
14  
15  
16  
17

18 **Author statement:** all authors (VV, GT, HP, PVR) have been involved in the design, analysis and  
19 writing of this paper. During the formal analysis, the first author took the lead with the support of  
20 both co-authors. The first author made the first draft of the paper after which the co-authors revised  
21 the entire. The first author is the guarantor. The corresponding author attests that all listed authors  
22 meet authorship criteria and that no others meeting the criteria have been omitted.  
23  
24

25 **Data sharing:** data are available upon reasonable request.  
26

27 **Funding:** no funding.  
28

29 **Competing interests declaration:** All authors declare they have no competing interests.  
30

31 **Acknowledgements:** We thank all 132 GPs who took the time to give an interview during busy times.  
32 Furthermore, we thank the Irish author Ann Lane for editing our manuscript.  
33  
34  
35  
36  
37  
38  
39  
40  
41  
42  
43  
44  
45  
46  
47  
48  
49  
50  
51

## 52 REFERENCES

53  
54 1 Tanne JH, Hayasaki E, Zastrow M, Pulla P, et al. Covid-19: how doctors and healthcare systems are  
55 tackling coronavirus worldwide. *BMJ* 2020;368:m1090  
56  
57  
58  
59  
60

- 1  
2  
3 2 van Olmen J, Remmen R, Van Royen P, et al. Regional coordination and bottom-up response of  
4 general practitioners in Belgium and the Netherlands. *BMJ* 2020;369:m1377. doi:  
5 10.1136/bmj.m1377  
6
- 7  
8 3 Morreel S, Philips H, Verhoeven V. Organisation and characteristics of out-of-hours primary care  
9 during a COVID-19 outbreak. In press.  
10
- 11 4 Allen J, Gay B, Crebolder H, et al. The European definitions of the key features of the discipline of  
12 general practice: the role of the GP and core competencies. *Br J Gen Pract.* 2002;52:526-7  
13
- 14 5 Wonca-Europe definition of Family Medicine. 3rd edition 2011. <http://www.woncaeurope.org/>  
15 (accessed 18th April 2020)  
16
- 17 6. Kunin M, Engelhard D, Piterman L, Thomas S. Response of General Practitioners to Infectious  
18 Disease Public Health Crises: An Integrative Systematic Review of the Literature. *Disaster Med Public*  
19 *Health Prep.* 2013;7:522-33  
20
- 21 7. Taro Tomizuka, Yasuhiro Kanatani, Kazuo Kawahara. Insufficient Preparedness of Primary Care  
22 Practices for Pandemic Influenza and the Effect of a Preparedness Plan in Japan: A Prefecture-Wide  
23 Cross-Sectional Study. *BMC Fam Pract.* 2013;14:174  
24
- 25 8. Kunin M, Engelhard D, Thomas S, Ashworth M, Piterman L. Influenza pandemic 2009/A/H1N1  
26 management policies in primary care: a comparative analysis of three countries. *Aust Health Rev.*  
27 2013;37:291-9  
28
- 29 9. Holmberg M, Lundgren B. Framing Post-Pandemic Preparedness: Comparing Eight European Plans.  
30 *Glob Public Health* 2018;13:99-114  
31
- 32 10. Hummers Pradier E, Beyer M, Chevallier P, et al. The research agenda for general practice/family  
33 medicine and primary health care in Europe. Part 1. Background and methodology. *Eur J Gen Pract.*  
34 2009;15:243-50.  
35
- 36 11 Gale NK, Heath G, Cameron E, Rashid S, Redwood S. Using the framework method for the analysis  
37 of qualitative data in multi-disciplinary health research. *BMC Med Res Methodol.* 2013;13:117  
38
- 39 12 Ritchie J, Spencer L. Qualitative data analysis for applied policy research. In: Bryman A, Burgess R,  
40 editors. *Analysing qualitative data.* London: Routledge; 1993:173–194.  
41
- 42 13. Korstjens I, Moser A. Series: Practical guidance to qualitative research. Part 4: trustworthiness and  
43 publishing. *Eur J Gen Pract.* 2018;24:1–5. doi: 10.1080/13814788.2017.1375092.  
44
- 45 14. O'Brien BC, Harris IB, Beckman TJ, Reed DA, Cook DA. Standards for reporting qualitative  
46 research: a synthesis of recommendations. *Acad Med.* 2014;89:1245-1251.  
47
- 48 15. Greenhalgh T, Koh GCH, Car J Covid-19: a remote assessment in primary care. *BMJ* 2020; 368 doi:  
49 <https://doi.org/10.1136/bmj.m1182>  
50
- 51 16. Greenhalgh T, Wherton J, Shaw S, Morrison C. Video consultations for covid-19. *BMJ*  
52 2020;368:m998 doi: 10.1136/bmj.m998  
53  
54  
55  
56  
57  
58  
59  
60

- 1  
2  
3 17.Losada-Baltar A, Jiménez-Gonzalo L, Gallego-Alberto L, et al. "We're staying at home". Association  
4 of self-perceptions of aging, personal and family resources and loneliness with psychological distress  
5 during the lock-down period of COVID-19. *J Gerontol B Psychol Sci Soc Sci*. 2020 pii: gbaa048. doi:  
6 10.1093/geronb/gbaa048  
7  
8  
9 18.Chung RY, Dong D, Li MM. Socioeconomic gradient in health and the covid-19 outbreak. *BMJ*  
10 2020; 369 doi: <https://doi.org/10.1136/bmj.m1329>  
11  
12 19.Lu W, Wang H, Lin Y, Li L. Psychological status of medical workforce during the COVID-19  
13 pandemic: A cross-sectional study. *Psychiatry Res*. 2020;288:112936. doi:  
14 10.1016/j.psychres.2020.112936  
15  
16 20.Kang L, Ma S, Chen M, et al. Impact on mental health and perceptions of psychological care  
17 among medical and nursing staff in Wuhan during the 2019 novel coronavirus disease outbreak: A  
18 cross-sectional study. *Brain Behav Immun*. 2020 pii: S0889-1591(20)30348-2. doi:  
19 10.1016/j.bbi.2020.03.028  
20  
21 21. Rose S. Medical Student Education in the Time of COVID-19 *JAMA*. Published online March 31,  
22 2020. doi:10.1001/jama.2020.5227  
23  
24 22.Gobat N, Amuasi J, Yazdanpanah Y, Sigfrid L, et al. Advancing Preparedness for Clinical  
25 Research During Infectious Disease Epidemics. *ERJ Open Res*. 2019; 5: 00227-2018  
26  
27 23. Nietzsche F. *Twilight of the Idols: or How to Philosophise with a Hammer* (Oxford World's  
28 Classics). Publisher: Oxford University Press, 1998. ISBN 10: 0192831380  
29  
30  
31  
32  
33  
34  
35  
36  
37  
38  
39  
40  
41  
42  
43  
44  
45  
46  
47  
48  
49  
50  
51  
52  
53  
54  
55  
56  
57  
58  
59  
60

## Supplementary file: Interview guide

1. How was **practice management** modified in the context of COVID-19; how is the collaboration with colleagues/the hospital organized? What is the change in workload? To what extent are telephone consults adopted and what is their impact on practice management?
2. How is **person-centred care** affected? Can this aspect of care be preserved in telephone consultations? Is attention paid/time available to address worries, fear of patients or is the estimation of physical illness primordial?
3. How is decision making influenced in consults for **acute, non-COVID or chronic problems**?
4. How does a **comprehensive approach** involve COVID-specific risk management and health education?
5. Concerning **community orientation**, how is dealt with the contagious aspect and with the need for illness certificates for school and work?
6. Which broader, **holistic view** does the GP have on the outbreak and management of an epidemic such as COVID19?
7. How does the GP **protect himself** against infection during his work with infected or possibly infected patients?

# Reporting checklist for qualitative study.

Based on the SRQR guidelines.

## Instructions to authors

Complete this checklist by entering the page numbers from your manuscript where readers will find each of the items listed below.

Your article may not currently address all the items on the checklist. Please modify your text to include the missing information. If you are certain that an item does not apply, please write "n/a" and provide a short explanation.

Upload your completed checklist as an extra file when you submit to a journal.

In your methods section, say that you used the SRQR reporting guidelines, and cite them as:

O'Brien BC, Harris IB, Beckman TJ, Reed DA, Cook DA. Standards for reporting qualitative research: a synthesis of recommendations. Acad Med. 2014;89(9):1245-1251.

|              |                                                                                                                                                                                                                                                                | Page   |
|--------------|----------------------------------------------------------------------------------------------------------------------------------------------------------------------------------------------------------------------------------------------------------------|--------|
|              | Reporting Item                                                                                                                                                                                                                                                 | Number |
| <b>Title</b> | <p><a href="#">#1</a> Concise description of the nature and topic of the study identifying the study as qualitative or indicating the approach (e.g. ethnography, grounded theory) or data collection methods (e.g. interview, focus group) is recommended</p> | 1      |



**Abstract**

2

[#2](#) Summary of the key elements of the study using the abstract format of the intended publication; typically includes background, purpose, methods, results and conclusions

**Introduction**

3

## Problem formulation

[#3](#) Description and significance of the problem / phenomenon studied: review of relevant theory and empirical work; problem statement

## Purpose or research question

[#4](#) Purpose of the study and specific objectives or questions

3

**Methods**

## Qualitative approach and research paradigm

[#5](#) Qualitative approach (e.g. ethnography, grounded theory, case study, phenomenology, narrative research) and guiding theory if appropriate; identifying the research paradigm (e.g. postpositivist, constructivist / interpretivist) is also recommended; rationale. The rationale should briefly discuss the justification for choosing that theory, approach, method or technique rather than other options available; the assumptions and limitations implicit in those choices and how those choices influence study conclusions and transferability.

4

As appropriate the rationale for several items might be discussed together.

|    |                           |                     |   |
|----|---------------------------|---------------------|---|
| 1  |                           |                     |   |
| 2  |                           |                     |   |
| 3  |                           |                     |   |
| 4  |                           |                     |   |
| 5  |                           |                     |   |
| 6  | Researcher                | <a href="#">#6</a>  | 4 |
| 7  |                           |                     |   |
| 8  | characteristics and       |                     |   |
| 9  |                           |                     |   |
| 10 | reflexivity               |                     |   |
| 11 |                           |                     |   |
| 12 |                           |                     |   |
| 13 |                           |                     |   |
| 14 |                           |                     |   |
| 15 |                           |                     |   |
| 16 |                           |                     |   |
| 17 |                           |                     |   |
| 18 |                           |                     |   |
| 19 |                           |                     |   |
| 20 |                           |                     |   |
| 21 |                           |                     |   |
| 22 | Context                   | <a href="#">#7</a>  | 4 |
| 23 |                           |                     |   |
| 24 |                           |                     |   |
| 25 | Sampling strategy         | <a href="#">#8</a>  | 4 |
| 26 |                           |                     |   |
| 27 |                           |                     |   |
| 28 |                           |                     |   |
| 29 |                           |                     |   |
| 30 |                           |                     |   |
| 31 |                           |                     |   |
| 32 |                           |                     |   |
| 33 |                           |                     |   |
| 34 |                           |                     |   |
| 35 | Ethical issues pertaining | <a href="#">#9</a>  | 4 |
| 36 |                           |                     |   |
| 37 | to human subjects         |                     |   |
| 38 |                           |                     |   |
| 39 |                           |                     |   |
| 40 |                           |                     |   |
| 41 |                           |                     |   |
| 42 |                           |                     |   |
| 43 |                           |                     |   |
| 44 |                           |                     |   |
| 45 | Data collection methods   | <a href="#">#10</a> | 4 |
| 46 |                           |                     |   |
| 47 |                           |                     |   |
| 48 |                           |                     |   |
| 49 |                           |                     |   |
| 50 |                           |                     |   |
| 51 |                           |                     |   |
| 52 |                           |                     |   |
| 53 |                           |                     |   |
| 54 |                           |                     |   |
| 55 |                           |                     |   |
| 56 |                           |                     |   |
| 57 |                           |                     |   |
| 58 |                           |                     |   |
| 59 |                           |                     |   |
| 60 |                           |                     |   |

|    |                         |                     |                                                          |      |
|----|-------------------------|---------------------|----------------------------------------------------------|------|
| 1  | Data collection         | <a href="#">#11</a> | Description of instruments (e.g. interview guides,       | 4    |
| 2  |                         |                     | questionnaires) and devices (e.g. audio recorders)       |      |
| 3  | instruments and         |                     | used for data collection; if / how the instruments(s)    |      |
| 4  |                         |                     | changed over the course of the study                     |      |
| 5  | technologies            |                     |                                                          |      |
| 6  |                         |                     |                                                          |      |
| 7  |                         |                     |                                                          |      |
| 8  |                         |                     |                                                          |      |
| 9  |                         |                     |                                                          |      |
| 10 |                         |                     |                                                          |      |
| 11 | Units of study          | <a href="#">#12</a> | Number and relevant characteristics of participants,     | 4    |
| 12 |                         |                     | documents, or events included in the study; level of     |      |
| 13 |                         |                     | participation (could be reported in results)             |      |
| 14 |                         |                     |                                                          |      |
| 15 |                         |                     |                                                          |      |
| 16 |                         |                     |                                                          |      |
| 17 |                         |                     |                                                          |      |
| 18 |                         |                     |                                                          |      |
| 19 | Data processing         | <a href="#">#13</a> | Methods for processing data prior to and during          | 4    |
| 20 |                         |                     | analysis, including transcription, data entry, data      |      |
| 21 |                         |                     | management and security, verification of data integrity, |      |
| 22 |                         |                     | data coding, and anonymisation / deidentification of     |      |
| 23 |                         |                     | excerpts                                                 |      |
| 24 |                         |                     |                                                          |      |
| 25 |                         |                     |                                                          |      |
| 26 |                         |                     |                                                          |      |
| 27 |                         |                     |                                                          |      |
| 28 |                         |                     |                                                          |      |
| 29 |                         |                     |                                                          |      |
| 30 |                         |                     |                                                          |      |
| 31 | Data analysis           | <a href="#">#14</a> | Process by which inferences, themes, etc. were           | 4    |
| 32 |                         |                     | identified and developed, including the researchers      |      |
| 33 |                         |                     | involved in data analysis; usually references a specific |      |
| 34 |                         |                     | paradigm or approach; rationale                          |      |
| 35 |                         |                     |                                                          |      |
| 36 |                         |                     |                                                          |      |
| 37 |                         |                     |                                                          |      |
| 38 |                         |                     |                                                          |      |
| 39 |                         |                     |                                                          |      |
| 40 |                         |                     |                                                          |      |
| 41 | Techniques to enhance   | <a href="#">#15</a> | Techniques to enhance trustworthiness and credibility    | 4    |
| 42 |                         |                     | of data analysis (e.g. member checking, audit trail,     |      |
| 43 | trustworthiness         |                     | triangulation); rationale                                |      |
| 44 |                         |                     |                                                          |      |
| 45 |                         |                     |                                                          |      |
| 46 |                         |                     |                                                          |      |
| 47 |                         |                     |                                                          |      |
| 48 | <b>Results/findings</b> |                     |                                                          |      |
| 49 |                         |                     |                                                          |      |
| 50 |                         |                     |                                                          |      |
| 51 | Syntheses and           | <a href="#">#16</a> | Main findings (e.g. interpretations, inferences, and     | 4-11 |
| 52 |                         |                     | themes); might include development of a theory or        |      |
| 53 | interpretation          |                     | model, or integration with prior research or theory      |      |
| 54 |                         |                     |                                                          |      |
| 55 |                         |                     |                                                          |      |
| 56 |                         |                     |                                                          |      |
| 57 |                         |                     |                                                          |      |
| 58 |                         |                     |                                                          |      |
| 59 |                         |                     |                                                          |      |
| 60 |                         |                     |                                                          |      |

|    |                              |                     |                                                          |       |
|----|------------------------------|---------------------|----------------------------------------------------------|-------|
| 1  | Links to empirical data      | <a href="#">#17</a> | Evidence (e.g. quotes, field notes, text excerpts,       | 4-11  |
| 2  |                              |                     | photographs) to substantiate analytic findings           |       |
| 3  |                              |                     |                                                          |       |
| 4  |                              |                     |                                                          |       |
| 5  |                              |                     |                                                          |       |
| 6  | <b>Discussion</b>            |                     |                                                          |       |
| 7  |                              |                     |                                                          |       |
| 8  |                              |                     |                                                          |       |
| 9  |                              |                     |                                                          |       |
| 10 | Intergration with prior      | <a href="#">#18</a> | Short summary of main findings; explanation of how       | 13-14 |
| 11 | work, implications,          |                     | findings and conclusions connect to, support, elaborate  |       |
| 12 |                              |                     | on, or challenge conclusions of earlier scholarship;     |       |
| 13 | transferability and          |                     | discussion of scope of application / generalizability;   |       |
| 14 |                              |                     | identification of unique contributions(s) to scholarship |       |
| 15 | contribution(s) to the field |                     | in a discipline or field                                 |       |
| 16 |                              |                     |                                                          |       |
| 17 |                              |                     |                                                          |       |
| 18 |                              |                     |                                                          |       |
| 19 |                              |                     |                                                          |       |
| 20 |                              |                     |                                                          |       |
| 21 |                              |                     |                                                          |       |
| 22 |                              |                     |                                                          |       |
| 23 |                              |                     |                                                          |       |
| 24 | Limitations                  | <a href="#">#19</a> | Trustworthiness and limitations of findings              | 13    |
| 25 |                              |                     |                                                          |       |
| 26 |                              |                     |                                                          |       |
| 27 | <b>Other</b>                 |                     |                                                          |       |
| 28 |                              |                     |                                                          |       |
| 29 |                              |                     |                                                          |       |
| 30 | Conflicts of interest        | <a href="#">#20</a> | Potential sources of influence of perceived influence on | 15    |
| 31 |                              |                     | study conduct and conclusions; how these were            |       |
| 32 |                              |                     | managed                                                  |       |
| 33 |                              |                     |                                                          |       |
| 34 |                              |                     |                                                          |       |
| 35 |                              |                     |                                                          |       |
| 36 |                              |                     |                                                          |       |
| 37 |                              |                     |                                                          |       |
| 38 | Funding                      | <a href="#">#21</a> | Sources of funding and other support; role of funders in | 15    |
| 39 |                              |                     | data collection, interpretation and reporting            |       |
| 40 |                              |                     |                                                          |       |
| 41 |                              |                     |                                                          |       |
| 42 |                              |                     |                                                          |       |

None The SRQR checklist is distributed with permission of Wolters Kluwer © 2014 by the Association of American Medical Colleges. This checklist can be completed online using <https://www.goodreports.org/>, a tool made by the [EQUATOR Network](#) in collaboration with [Penelope.ai](#)
