# Supplementary material for: Impact of the COVID-19 pandemic on the core functions of primary care: will the cure be worse than the disease? A qualitative interview study in Flemish GPs
Source: PubMed Central journal article supplement — BMJ Open. 2020 Jun 17;10(6):e039674. doi: 10.1136/bmjopen-2020-039674 (PMC7306272; doi:10.1136/bmjopen-2020-039674), 2020-06-17
Supplement: bmjopen-2020-039674supp001.pdf [file bmjopen-2020-039674supp001.pdf]

## Supplementary file: Interview guide

1. How was **practice management** modified in the context of COVID-19; how is the collaboration with colleagues/the hospital organized? What is the change in workload? To what extent are telephone consults adopted and what is their impact on practice management?
2. How is **person-centred care** affected? Can this aspect of care be preserved in telephone consultations? Is attention paid/time available to address worries, fear of patients or is the estimation of physical illness primordial?
3. How is decision making influenced in consults for **acute, non-COVID or chronic problems**?
4. How does a **comprehensive approach** involve COVID-specific risk management and health education?
5. Concerning **community orientation**, how is dealt with the contagious aspect and with the need for illness certificates for school and work?
6. Which broader, **holistic view** does the GP have on the outbreak and management of an epidemic such as COVID19?
7. How does the GP **protect himself** against infection during his work with infected or possibly infected patients?
